# Supplementary material
Source: Research Square preprint supplement (doi:10.21203/rs.3.rs-7659033/v1)
Supplement: Supplementary file 1 [file 4b4f7e5c7d37028754866e20.docx]

**SUPPORTING INFORMATION**

**Large-scale identical-location electron microscopy enables quantifying nanoparticulate electrocatalyst degradation**

Ana Rebeka Kamšek1,2,3,*, Francisco Ruiz-Zepeda1,3, Domen Tabernik4, Jan Vidergar1,2, Anja Logar1,5, Ambrož Kregar6, Danijel Skočaj4, Goran Dražić1, Nejc Hodnik1,3,5,*

1 Department of Materials Chemistry, National Institute of Chemistry, Hajdrihova 19, 1000 Ljubljana, Slovenia

2 Faculty of Chemistry and Chemical Technology, University of Ljubljana, Večna pot 113, 1000 Ljubljana, Slovenia

3 Institute of Metals and Technology, Lepi pot 11, 1000 Ljubljana, Slovenia

4 Faculty of Computer and Information Science, University of Ljubljana, Večna pot 113, 1000 Ljubljana, Slovenia

5 University of Nova Gorica, Vipavska 13, 5000 Nova Gorica, Slovenia

6 Faculty of Mechanical Engineering, University of Ljubljana, Aškerčeva 6, 1000 Ljubljana, Slovenia

Corresponding authors: [ana.rebeka.kamsek@imt.si](mailto:ana.rebeka.kamsek@imt.si), [nejc.hodnik@ki.si](mailto:nejc.hodnik@ki.si)

**SI 1. Structural characterization of the investigated Pt-Co/C sample**

**SI 2. Analyzing the activation and degradation datasets by mechanism**

**SI 3. Cyclic voltammograms for activation and degradation**

**SI 4. TF-RDE and EDX investigations of the Pt-Co/C sample**

**SI 5. Analyzing datasets with automated particle detection and association**

**SI 6. Modeling metal dissolution and carbon corrosion on model nanoparticles**

**SI 1. Structural characterization of the investigated Pt-Co/C sample**


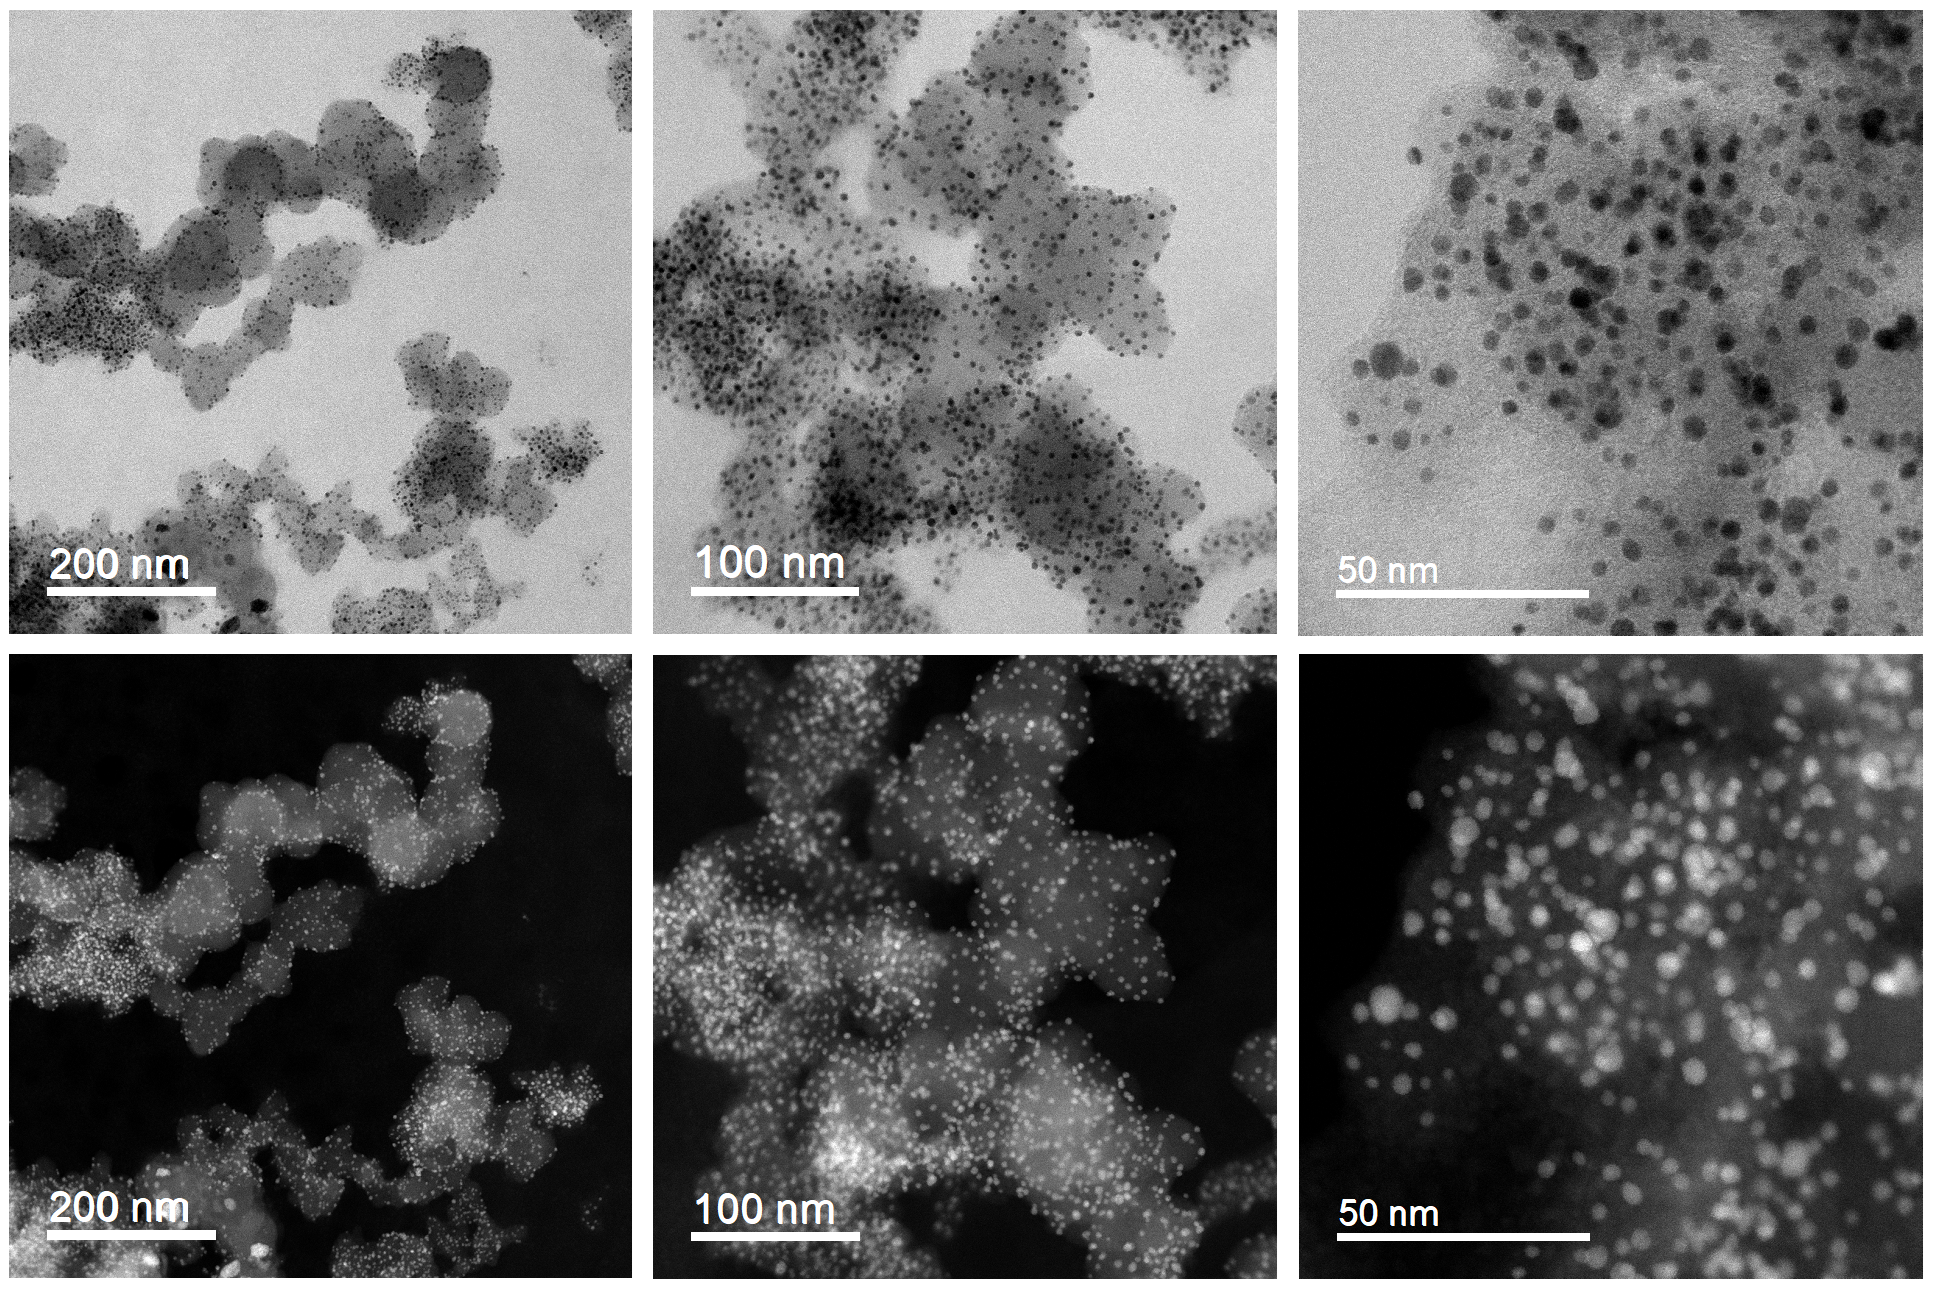


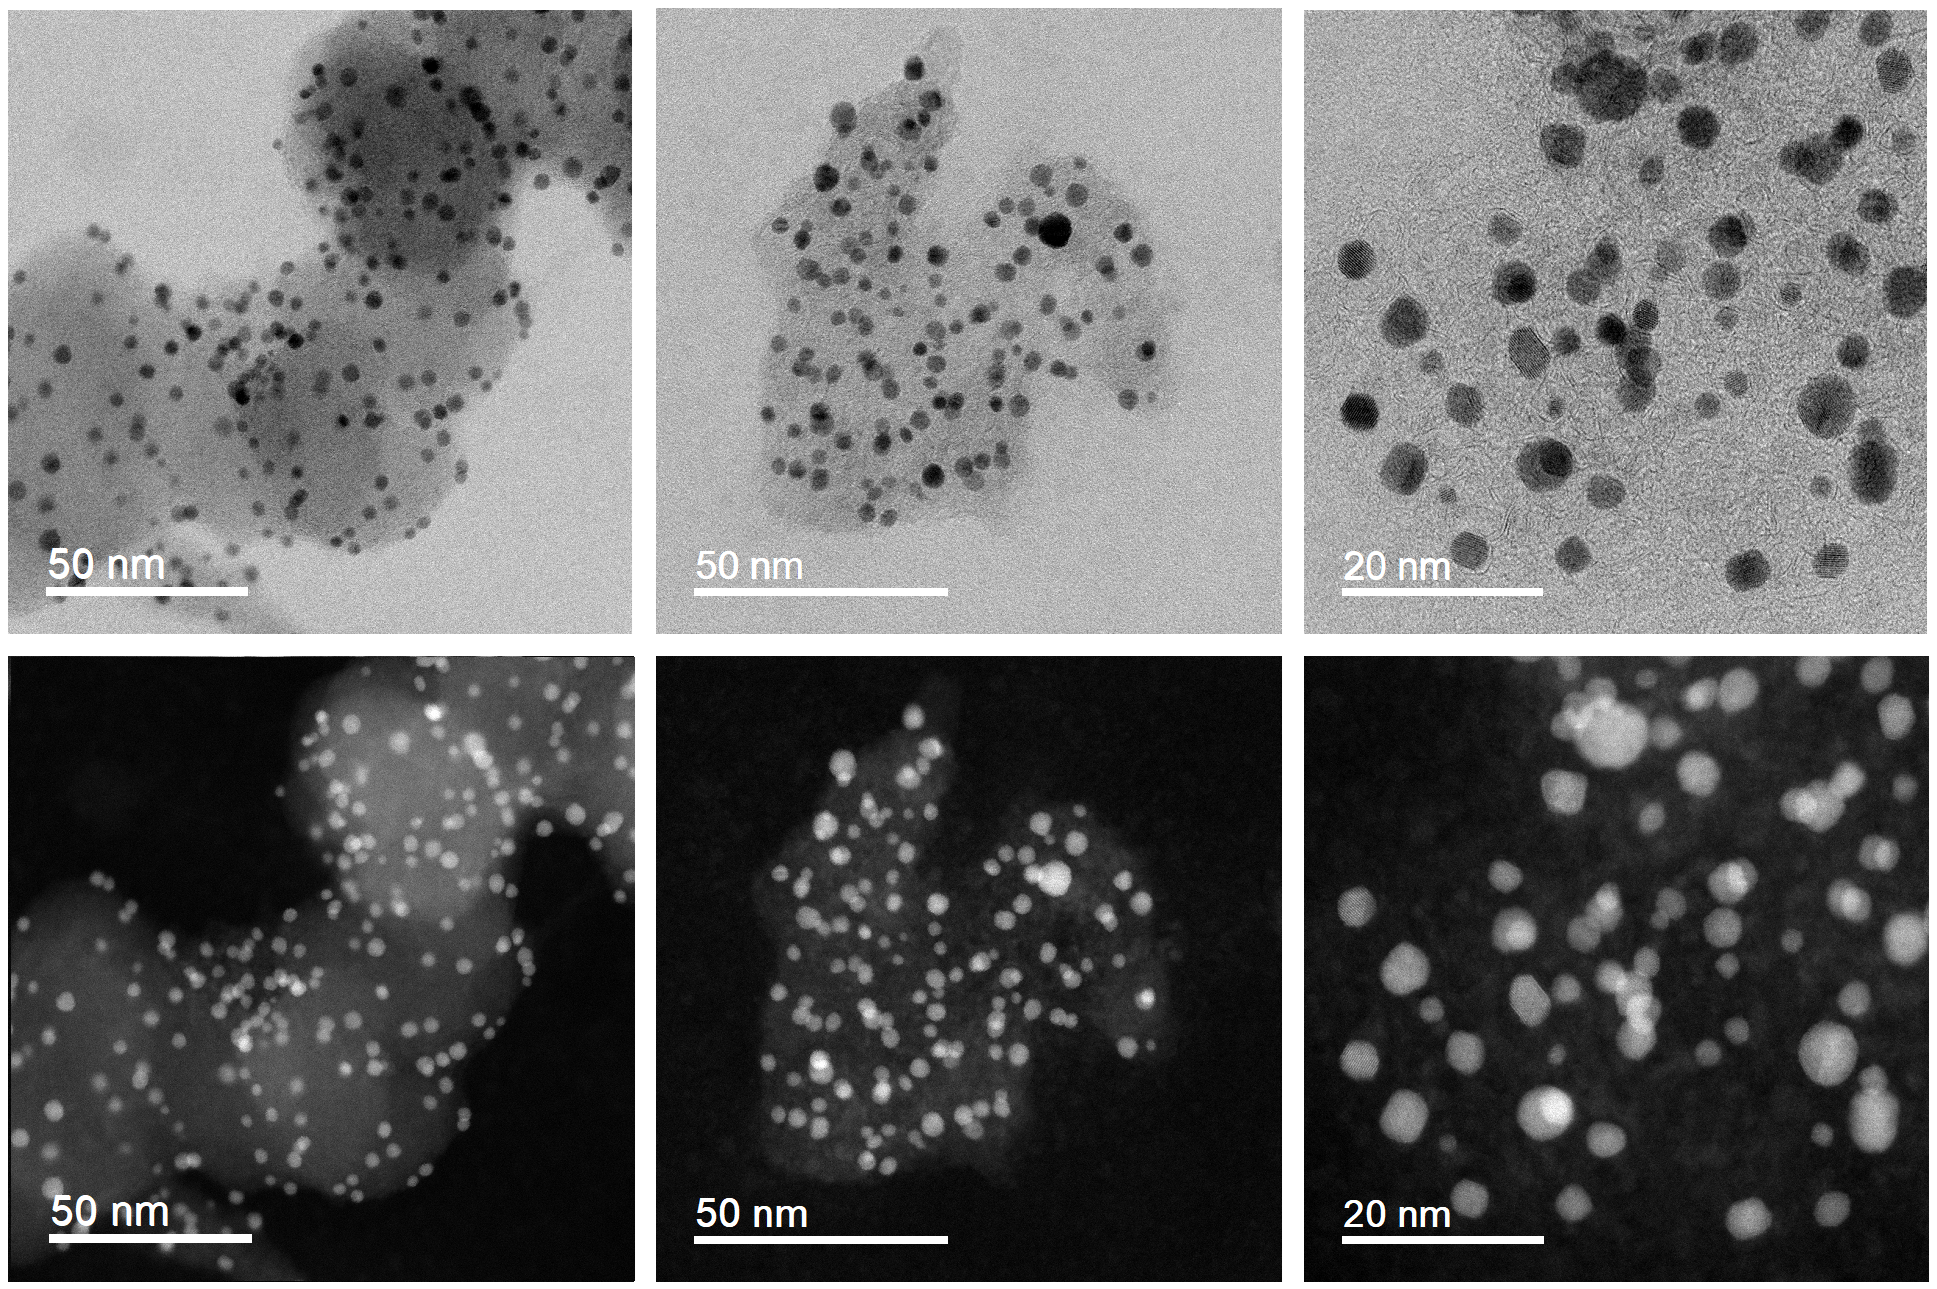


**Supplementary Fig. 1.** **STEM images.** BF- (top) and HAADF-STEM (bottom) images of the Pt-Co/C electrocatalyst in its initial state at various magnifications.


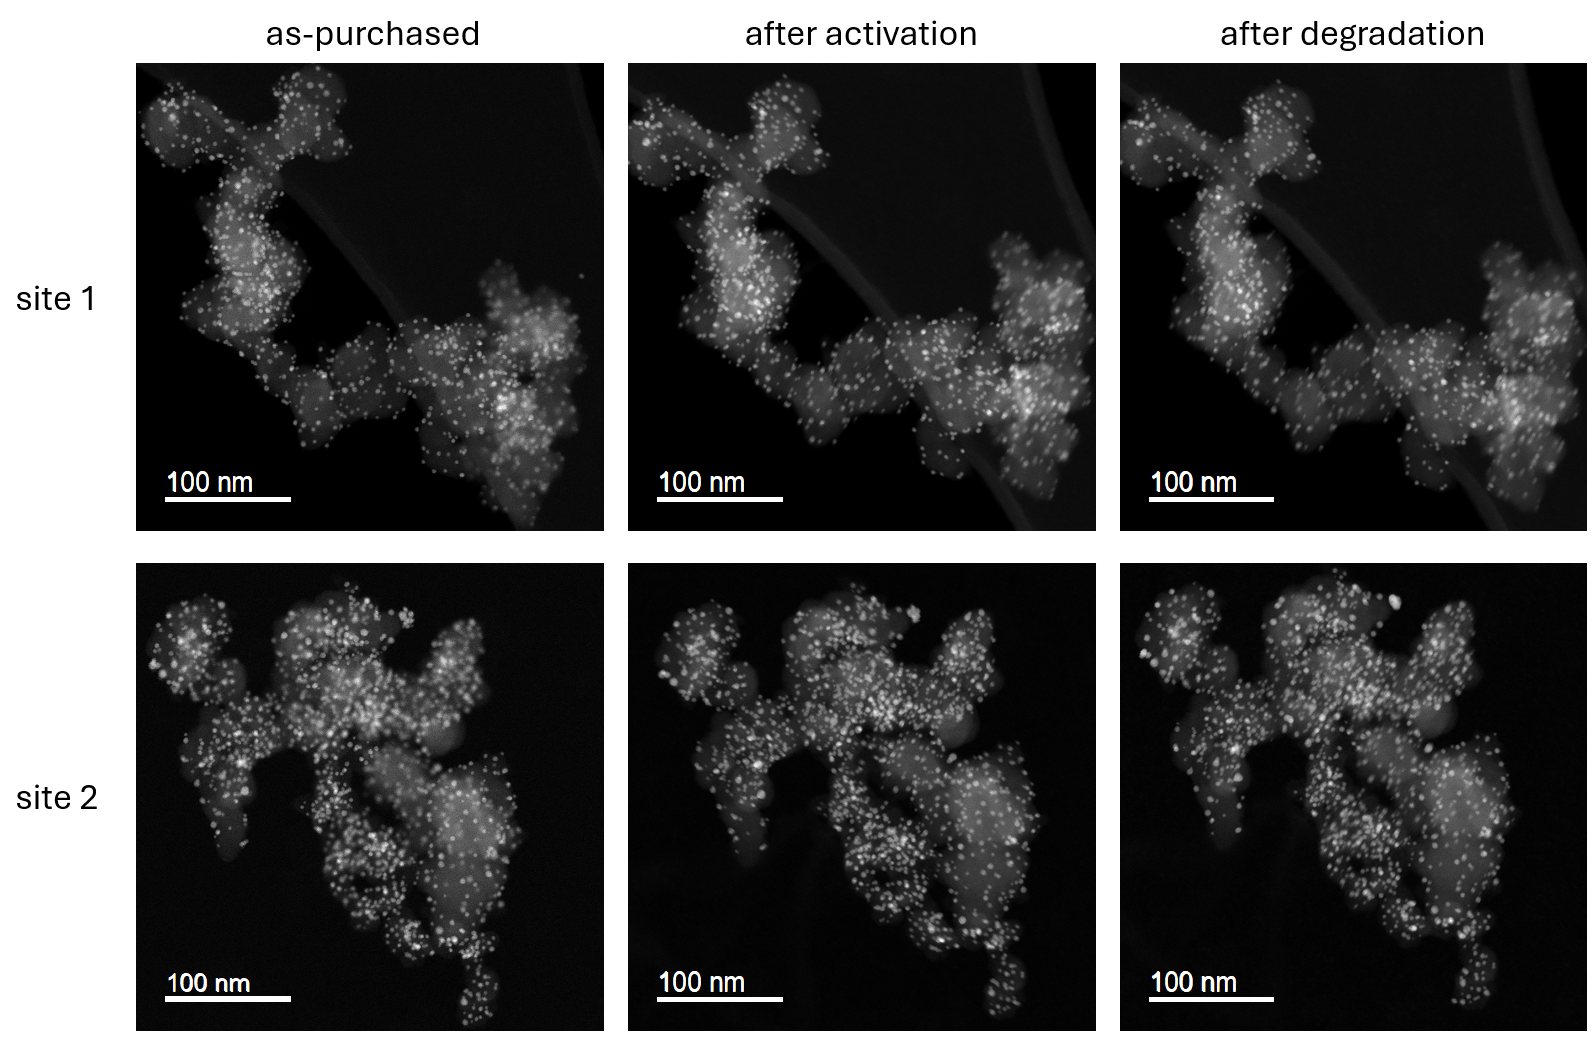


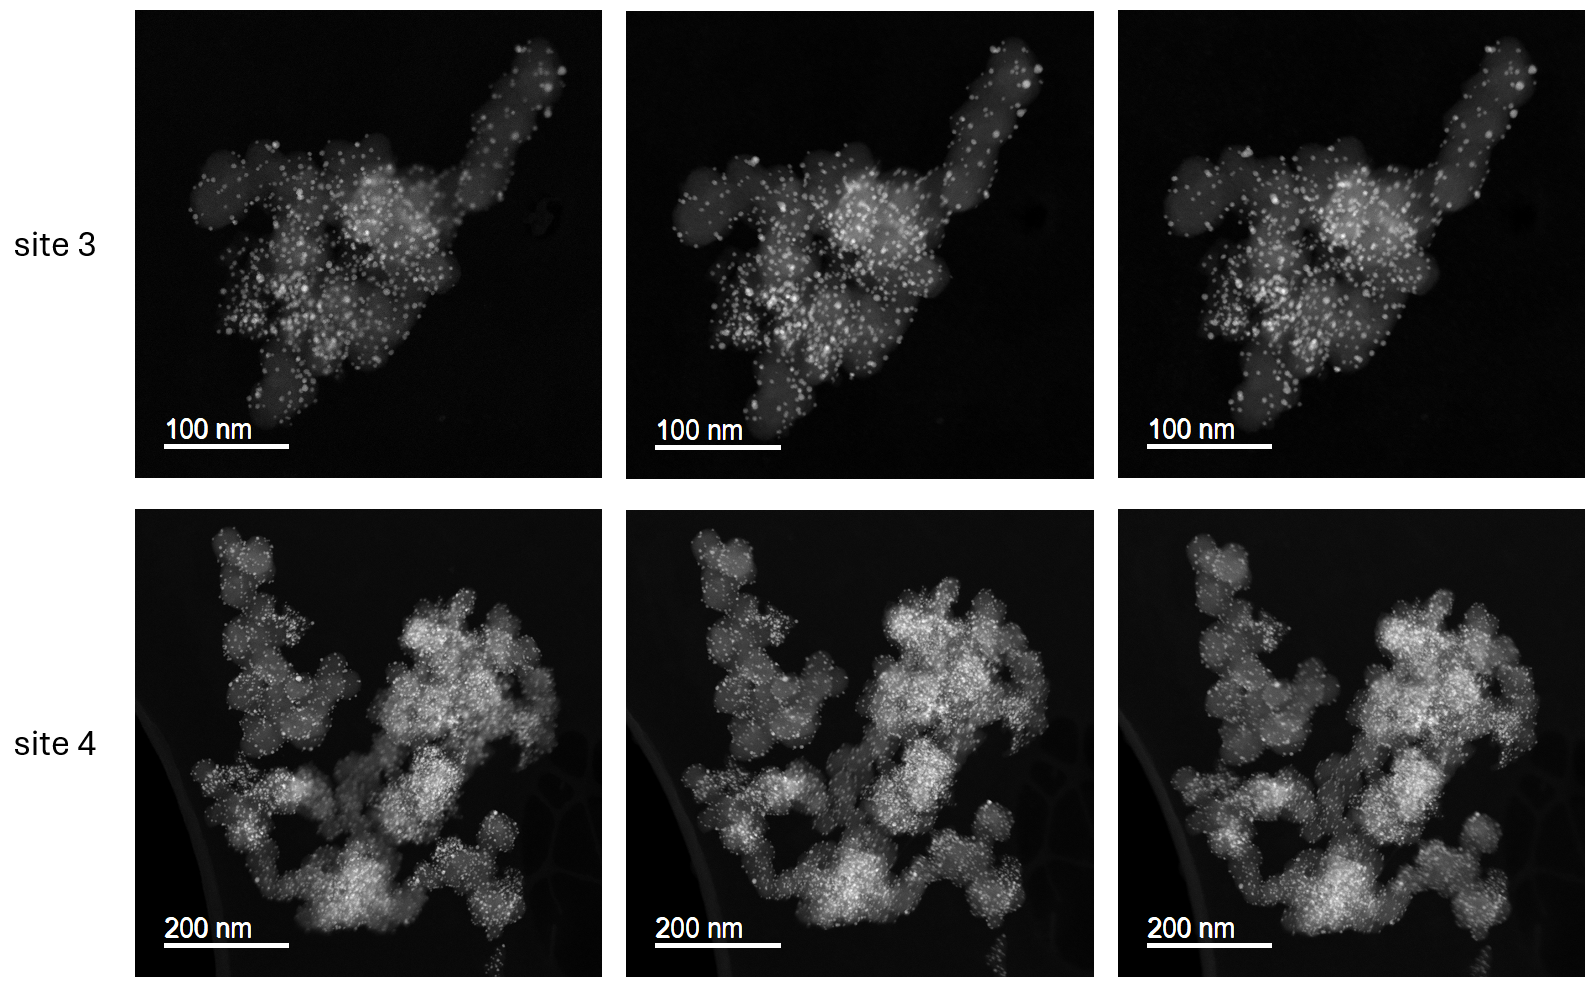


**Supplementary Fig. 2. HAADF-STEM images at a lower magnification.** The Pt-Co/C sample is imaged in the as-purchased state, after potential cycling activation (200 cycles, 0.05–1.2 VRHE, 300 mV/s, 0.1 M HClO4), and after degradation (5000 cycles, 0.4–1.2 VRHE, 1 V/s, 0.1 M HClO4).

**Supplementary Table 1**. EDX-STEM investigation of four catalyst regions from **Supplementary Fig. 2** in the as-purchased state, after potential cycling activation (200 cycles, 0.05–1.2 VRHE, 300 mV/s, 0.1 M HClO4), and after degradation (5000 cycles, 0.4–1.2 VRHE, 1 V/s, 0.1 M HClO4).

| **site no.** | **element** | **as-purchased [at.%]** | **after activation [at.%]** | **after degradation [at.%]** |
| --- | --- | --- | --- | --- |
| **1** | Co K | 47.3 | 63.7 | 58.3 |
| Pt L | 52.3 | 36.3 | 41.7 |
| **2** | Co K | 55.3 | 39.9 | 32.0 |
| Pt L | 44.7 | 60.0 | 68.0 |
| **3** | Co K | 54.9 | 54.8 | 54.2 |
| Pt L | 45.1 | 45.2 | 45.8 |
| **4** | Co K | 45.6 | 34.7 | 42.5 |
| Pt L | 54.4 | 65.4 | 57.5 |
| **average** | Co K | 50.8 | 48.3 | 46.7 |
| Pt L | 49.2 | 51.7 | 53.3 |

**
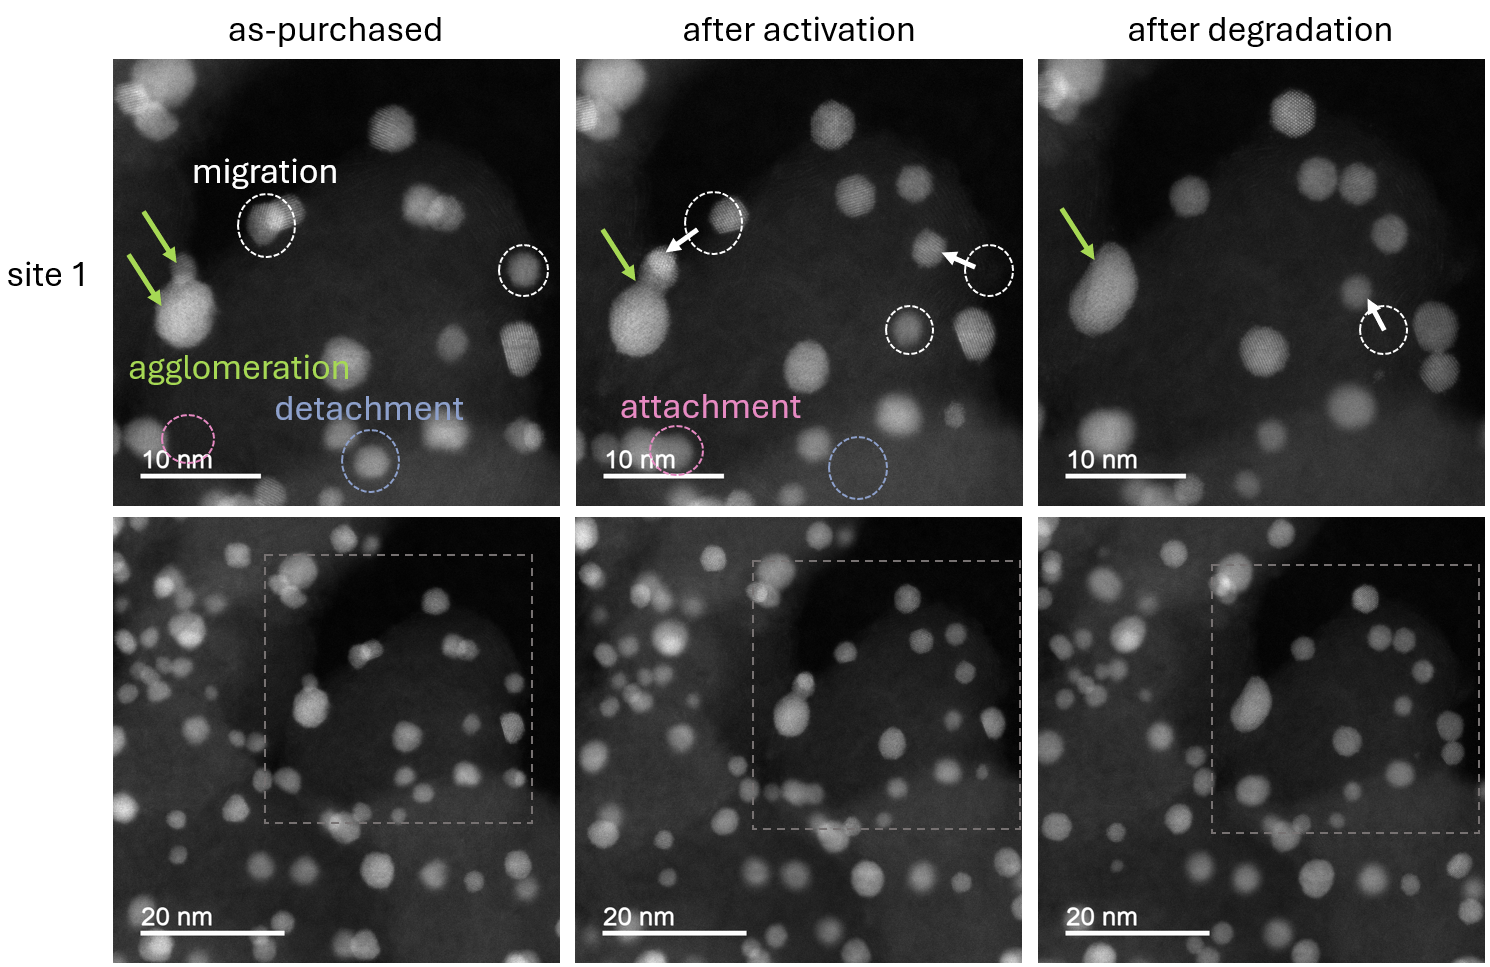
**

**
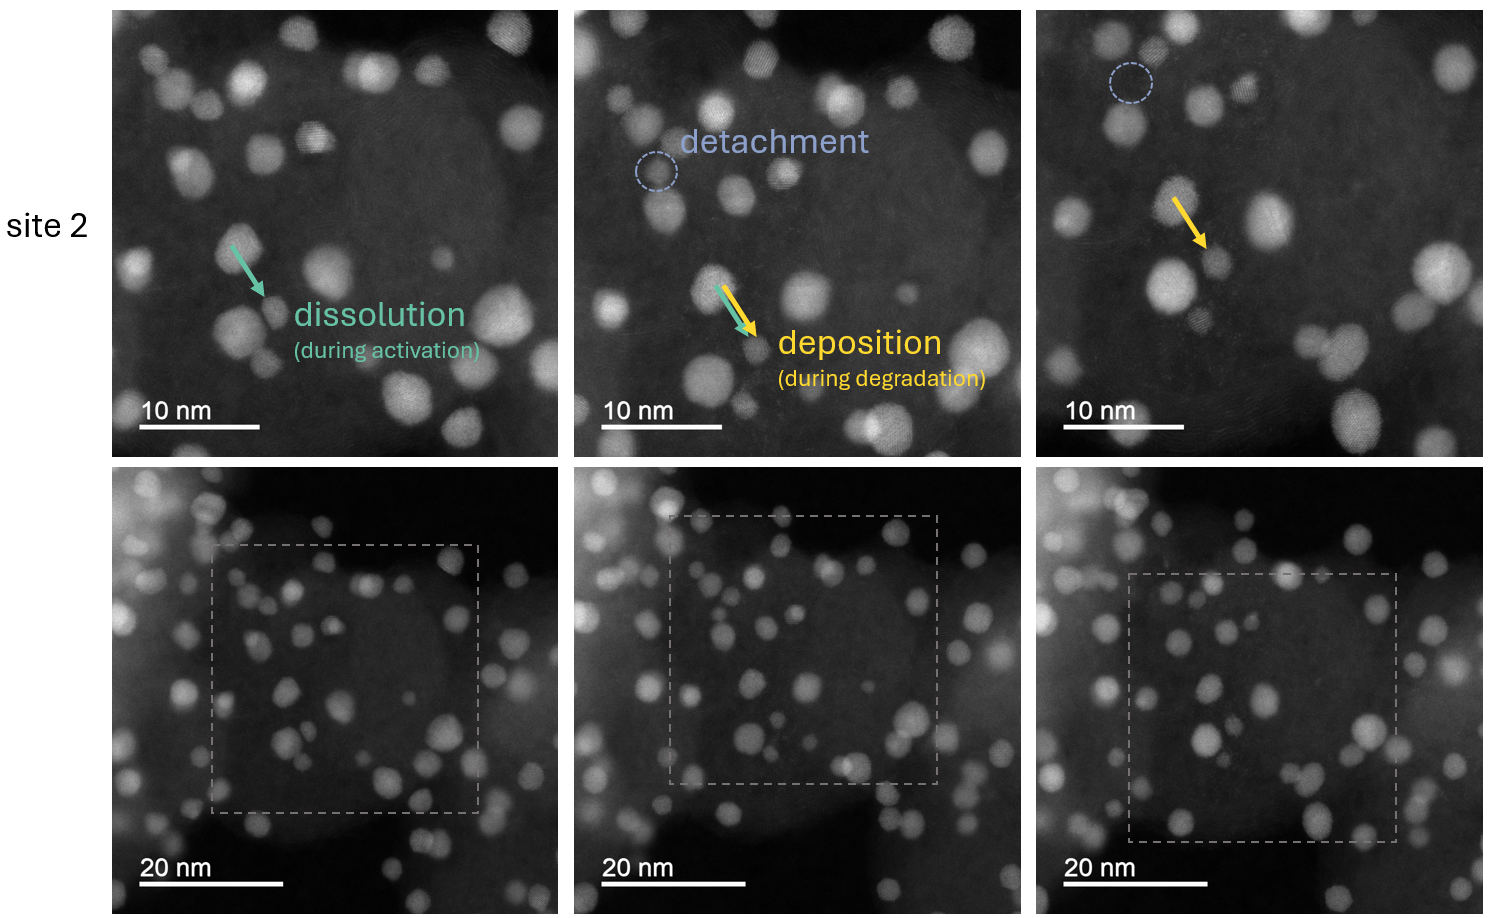
**

**Supplementary Fig. 3. Three-step IL-HAADF-STEM of Pt-Co/C.** Two regions of interest were imaged in their as-purchased state, after potential cycling activation (200 cycles, 0.05–1.2 VRHE, 300 mV/s, 600 rpm, 0.1 M HClO4), and after degradation (5000 cycles, 0.4–1.2 VRHE, 1 V/s, 600 rpm, 0.1 M HClO4). The top images show a close-up of the region with annotated specific degradation phenomena, and the bottom images are shown at lower magnification for context.

**SI 2. Analyzing the activation and degradation datasets by mechanism**

**Supplementary Table 2**. Average values and standard deviations of equivalent sphere diameters and circularities of Pt-Co nanoparticles, determined for each mechanism during potential cycling activation (200 cycles, 0.05–1.2 VRHE, 300 mV/s, 4 M HClO4).

|  | **diameter, before [nm]** | **circularity, before []** | **diameter, after [nm]** | **circularity, after []** | **number of events** |
| --- | --- | --- | --- | --- | --- |
| **dissolution** | 3.99 ± 0.84 | 0.87 ± 0.03 | 3.40 ± 0.89 | 0.88 ± 0.02 | 106 |
| **no changes** | 3.75 ± 0.82 | 0.87 ± 0.02 | 3.71 ± 0.82 | 0.87 ± 0.02 | 46 |
| **detachment** | 2.80 ± 0.77 | 0.81 ± 0.12 |  |  | 24 |
| **attachment** |  |  | 2.63 ± 1.02 | 0.81 ± 0.12 | 13 |
| **agglomeration** | 3.96 ± 0.76 | 0.87 ± 0.02 | 5.02 ± 1.63 | 0.79 ± 0.12 | 11 |
| **deposition** | 3.24 ± 1.00 | 0.87 ± 0.02 | 3.60 ± 1.01 | 0.88 ± 0.02 | 9 |

**Supplementary Table 3**. Average values and standard deviations of equivalent sphere diameters and circularities of Pt-Co nanoparticles, determined for each mechanism during potential cycling activation (200 cycles, 0.05–1.2 VRHE, 300 mV/s, 0.1 M HClO4), followed by degradation (5000 cycles, 0.4–1.2 VRHE, 1 V/s, 0.1 M HClO4).

|  | **diameter, before [nm]** | **circularity, before []** | **diameter, after [nm]** | **circularity, after []** | **number of events** |
| --- | --- | --- | --- | --- | --- |
| **dissolution** | 3.67 ± 0.79 | 0.88 ± 0.02 | 3.02 ± 1.03 | 0.87 ± 0.02 | 235 |
| **no changes** | 3.82 ± 0.87 | 0.88 ± 0.01 | 3.81 ± 0.87 | 0.87 ± 0.02 | 214 |
| **detachment** | 2.59 ± 0.59 | 0.84 ± 0.11 |  |  | 131 |
| **deposition** | 3.51 ± 0.92 | 0.88 ± 0.02 | 3.91 ± 0.96 | 0.87 ± 0.02 | 58 |
| **attachment** |  |  | 2.41 ± 0.75 | 0.65 ± 0.15 | 38 |
| **agglomeration** | 4.07 ± 0.75 | 0.88 ± 0.01 | 4.43 ± 1.78 | 0.83 ± 0.08 | 12 |
| **Ostwald ripening** | 3.62 ± 0.43 | 0.89 ± 0.01 | 3.96 ± 0.49 | 0.88 ± 0.01 | 5 |
| **complete Ostwald ripening** | 3.29 ± 2.35 | 0.89 ± 0.01 | 3.81 ± 2.03 | 0.84 ± 0.05 | 3 |

**SI 3. Cyclic voltammograms for activation and degradation**


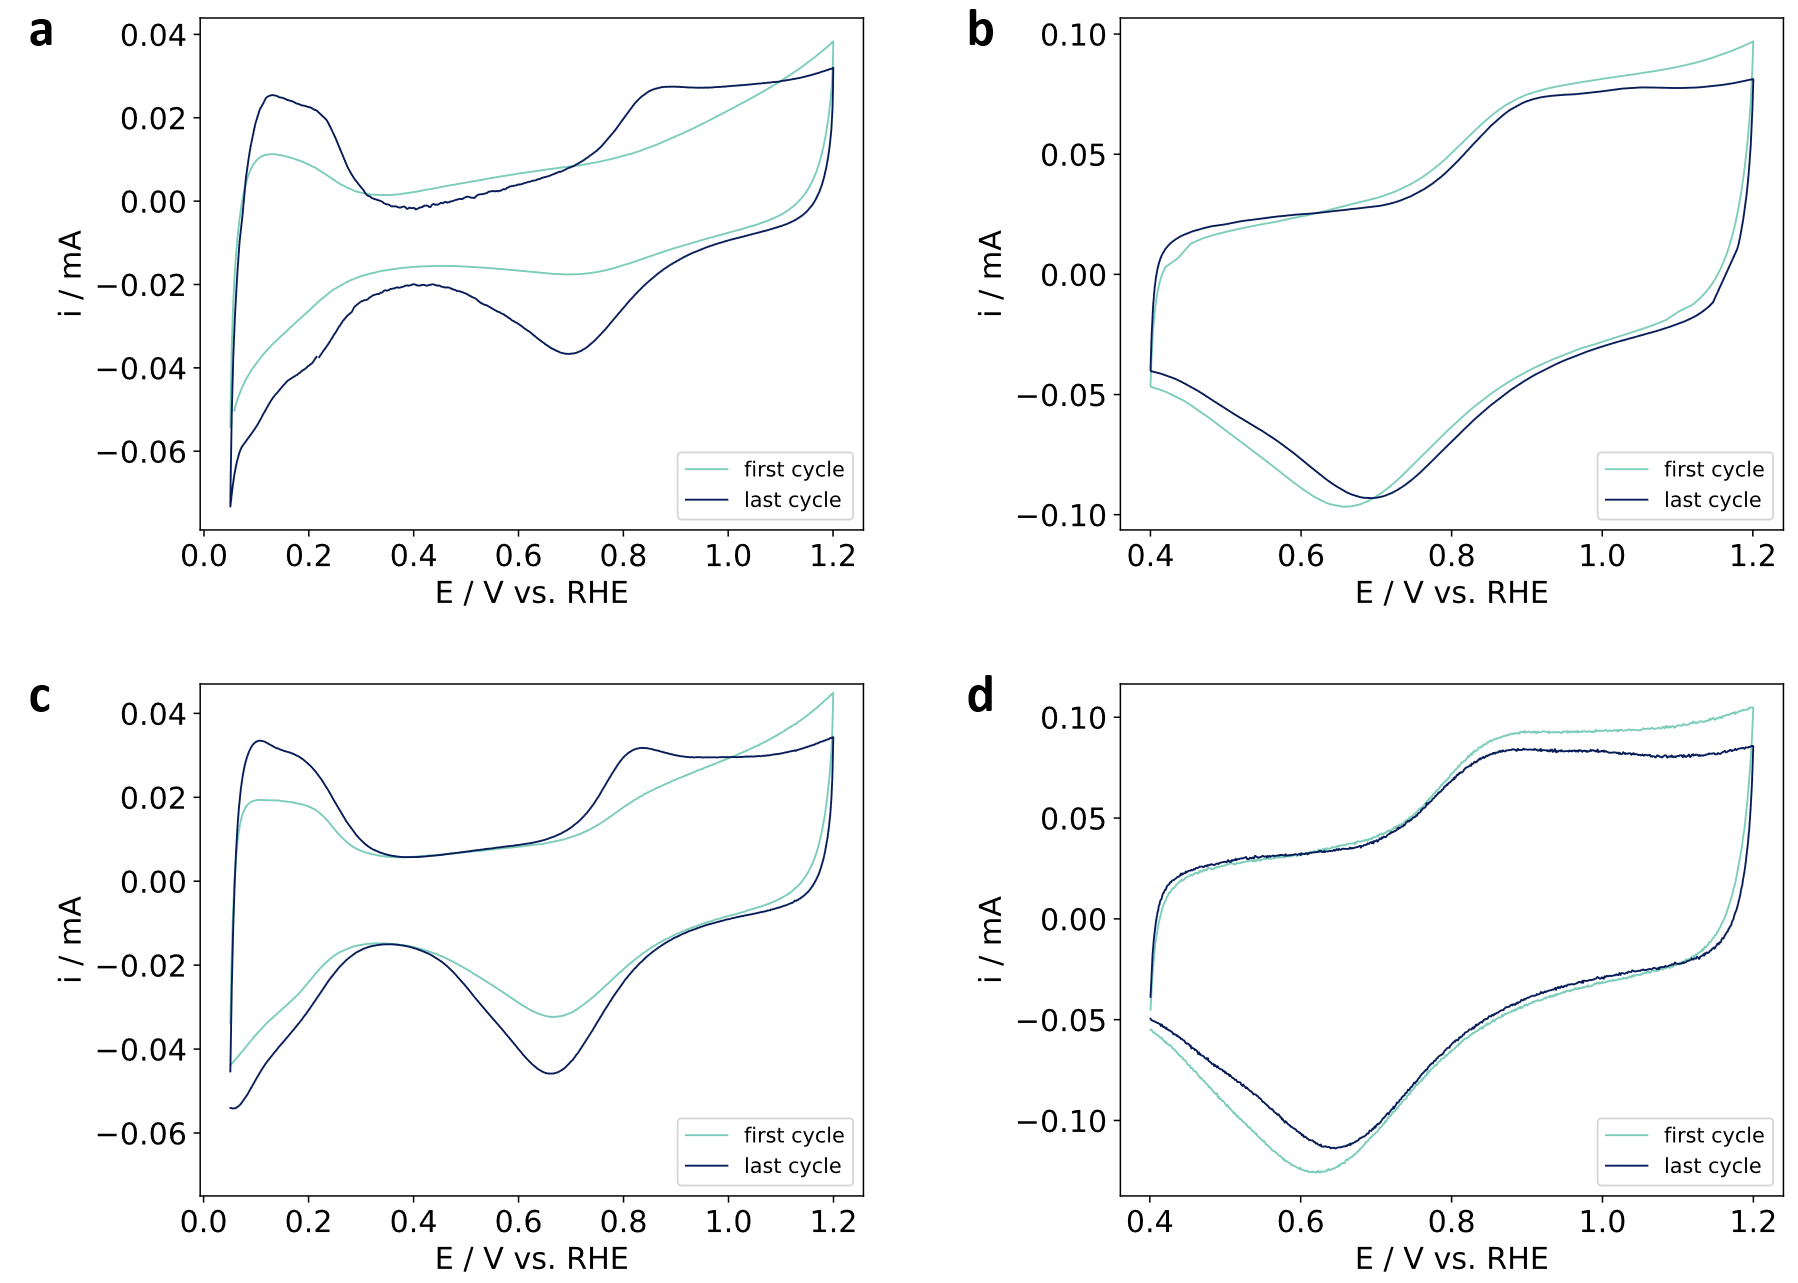


**Supplementary Fig. 4. Cyclic voltammetry results, collected with a modified floating electrode setup.** The first and last cycles of the **(a, c)** potential cycling activation (200 cycles, 0.05–1.2 VRHE, 300 mV/s, 0.1 M HClO4) and **(b, d)** degradation (5000 cycles, 0.4–1.2 VRHE, 1 V/s, 0.1 M HClO4) of the Pt-Co/C.

**
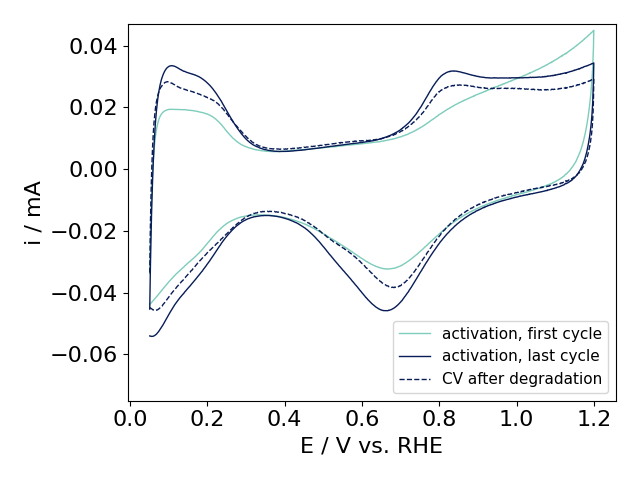
**

**Supplementary Fig. 5. Cyclic voltammetry comparison.** A full-range cyclic voltammogram, recorded after degradation, compared to the first and last cycles of the potential cycling activation (all 0.05–1.2 VRHE, 300 mV/s, 0.1 M HClO4) of the Pt-Co/C.

**SI 4. TF-RDE and EDX investigations of the Pt-Co/C sample**


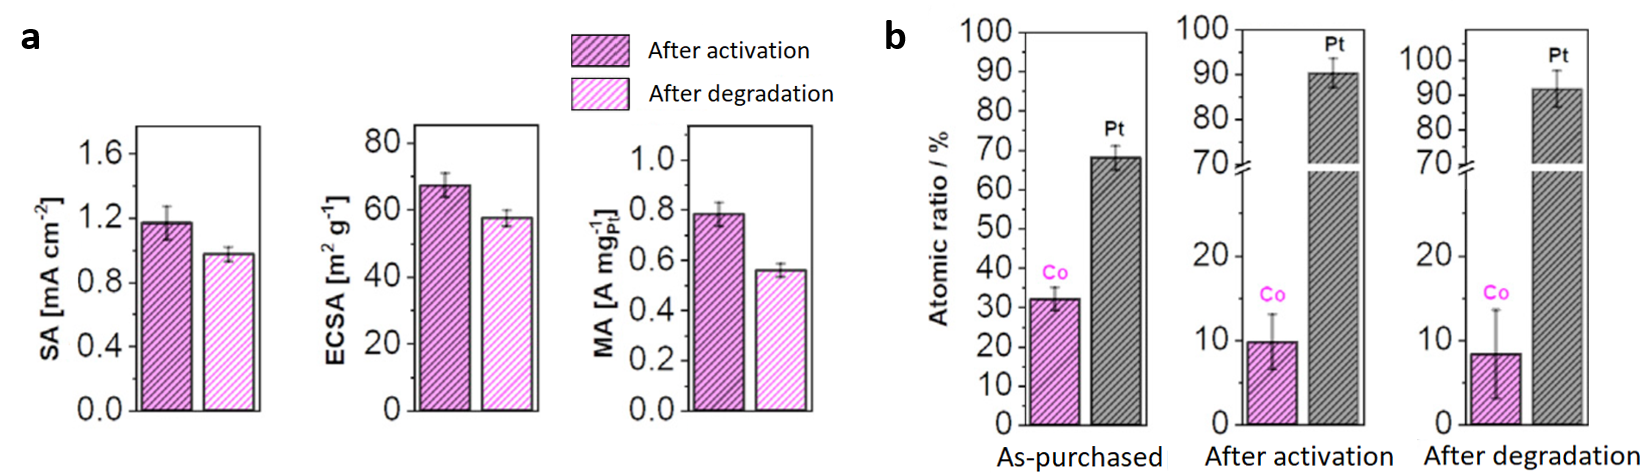


**Supplementary Fig. 6.** **RDE and EDX investigation of the Pt-Co/C electrocatalyst.** **a,** Specific activity (SA), ECSA, and mass activity (MA) of the Pt-Co/C after activation (200 cycles, 0.05–1.2 VRHE, 300 mV/s, 600 rpm, 0.1 M HClO4) and degradation (5000 cycles, 0.4–1.2 VRHE, 1 V/s, 600 rpm, 0.1 M HClO4), measured with a rotating disk electrode. **b,** Ex situ EDX-STEM elemental analysis of the Pt-Co/C in the initial state, after activation, and after degradation. Adapted from 1. [Attribution 4.0 International (CC BY 4.0).](https://creativecommons.org/licenses/by/4.0/legalcode)

**SI 5. Analyzing datasets with automated particle detection and association**

**Supplementary Note 1: Details on automated particle detection using a neural network**

Automatic particle detection was implemented using a Center-Direction Regression Network (CeDiRNet) designed for point-based object detection.2 The network consists of a two-stage architecture, regressing dense center-directions with a ConvNeXt backbone and a Feature Pyramid Network in the first stage, and a point localization from dense center-direction maps in the second stage.

CeDiRNet performs dense, per-pixel regression of vectors pointing to the nearest object center, enabling robust localization by leveraging a broad spatial context around each center rather than relying on a single-pixel prediction. This avoids learning features from highly unbalanced per-pixel binary classification, where loss is dominated by negative background pixels and only a small set of foreground pixels provides positive signals. Translating the problem into a regression of vectors pointing towards the closest object evenly spreads the learning signal to all pixels, forcing even pixels further away from the target to provide useful information for the detection. The mathematically well-defined appearance of the regressed center-directions renders the localization stage independent of domain-specific image features, allowing the use of a generic pre-trained model trained entirely on synthetic data.

The architecture was implemented in PyTorch 1.9, with CUDA 11.1, using Python 3.8. Code and datasets will be made publicly available at <https://github.com/vicoslab/CeDiRNet-STEM>.

1. Attribute extension for particle radius and circularity

The first stage of CeDiRNet was further extended to regress particle radius and circularity as a dense map prediction following a similar extension for orientations in CeDiRNet-3DoF.3 Both attributes were associated with the corresponding center location of the particle, regressing the associated values within 15 pixels of the center during training, while reading the values at the detected particle center during inference.

Circularity value was regressed directly, with values ranging from 0 to 1, while radius was transformed into a logarithmic value to reduce the range of values for regression. Both radius and circularity were trained using L1 together with center-directions, weighing the radius with a factor of 0.25, circularity loss with a factor of 0.5, and applying an additional uncertainty weighting between them and the center-directions loss.4

1. Input and learning details

For input, pairs of BF- and HAADF-STEM images were resized to 512x512 pixels, merged into two-channel images, and normalized according to the ImageNet standard. The dense regression network was trained on a single NVIDIA A100 40GB GPU using 23 pairs of images for 1000 epochs using the Adam optimizer with a batch size of 4 and a learning rate of 10-4 with polynomial decay using an exponent of 2. During training, images were augmented using random horizontal and vertical flips and color jittering with a factor of 0.3, each applied with a probability of 0.5. During training and evaluation, we excluded partially visible particles near the image borders, as their center positions, sizes, and shapes could not be determined accurately.

The regression stage was initialized with weights from an ImageNet-pretrained ConvNeXt-Base model. The localization stage used a generic network from ref. 2, trained on 16x NVIDIA A100 (40 GB) GPUs for 200 epochs using 512 × 512-pixel synthetic images, with a batch size of 786 and 5,000 unique synthetic samples per epoch, and without any additional training on STEM images.

The model was evaluated using standard localization metrics and absolute and relative error measures for diameter and circularity. Localization performance was assessed using the F1 score, which accounts for both precision and recall. Detections within 20 pixels of the ground-truth location were considered true positives; all others were classified as false positives. The F1 score was computed at the optimal score threshold on the test set. Diameter and circularity errors were evaluated only for true-positive detections. The F1 score was determined to be 96.32%, precision 94.47%, and recall 98.45%.

**Supplementary Table 4**. Average values and standard deviations of equivalent sphere diameters and circularities of Pt-Co nanoparticles (automated detection, manual association) were determined for each mechanism during potential cycling activation (200 cycles, 0.05–1.2 VRHE, 300 mV/s, 4 M HClO4).

|  | **diameter, before [nm]** | **circularity, before []** | **diameter, after [nm]** | **circularity, after []** | **number of events** |
| --- | --- | --- | --- | --- | --- |
| **dissolution** | 3.92 ± 0.83 | 0.88 ± 0.02 | 3.40 ± 0.83 | 0.88 ± 0.02 | 83 |
| **no changes** | 3.88 ± 0.84 | 0.88 ± 0.02 | 3.84 ± 0.86 | 0.88 ± 0.02 | 54 |
| **deposition** | 3.47 ± 0.67 | 0.86 ± 0.02 | 3.87 ± 0.76 | 0.87 ± 0.02 | 12 |
| **detachment** | 2.52 ± 0.70 | 0.89 ± 0.02 |  |  | 11 |
| **agglomeration** | 3.79 ± 0.34 | 0.89 ± 0.02 | 4.20 ± 0.22 | 0.87 ± 0.00 | 3 |
| **attachment** |  |  | 1.95 ± 0.47 | 0.90 ± 0.04 | 2 |
| **Ostwald ripening** | 2.67 ± 0.69 | 0.87 ± 0.00 | 3.30 ± 0.23 | 0.87 ± 0.00 | 2 |
| **complete Ostwald ripening** | 3.70 ± 0.05 | 0.83 ± 0.00 | 3.94 ± 0.00 | 0.84 ± 0.00 | 1 |


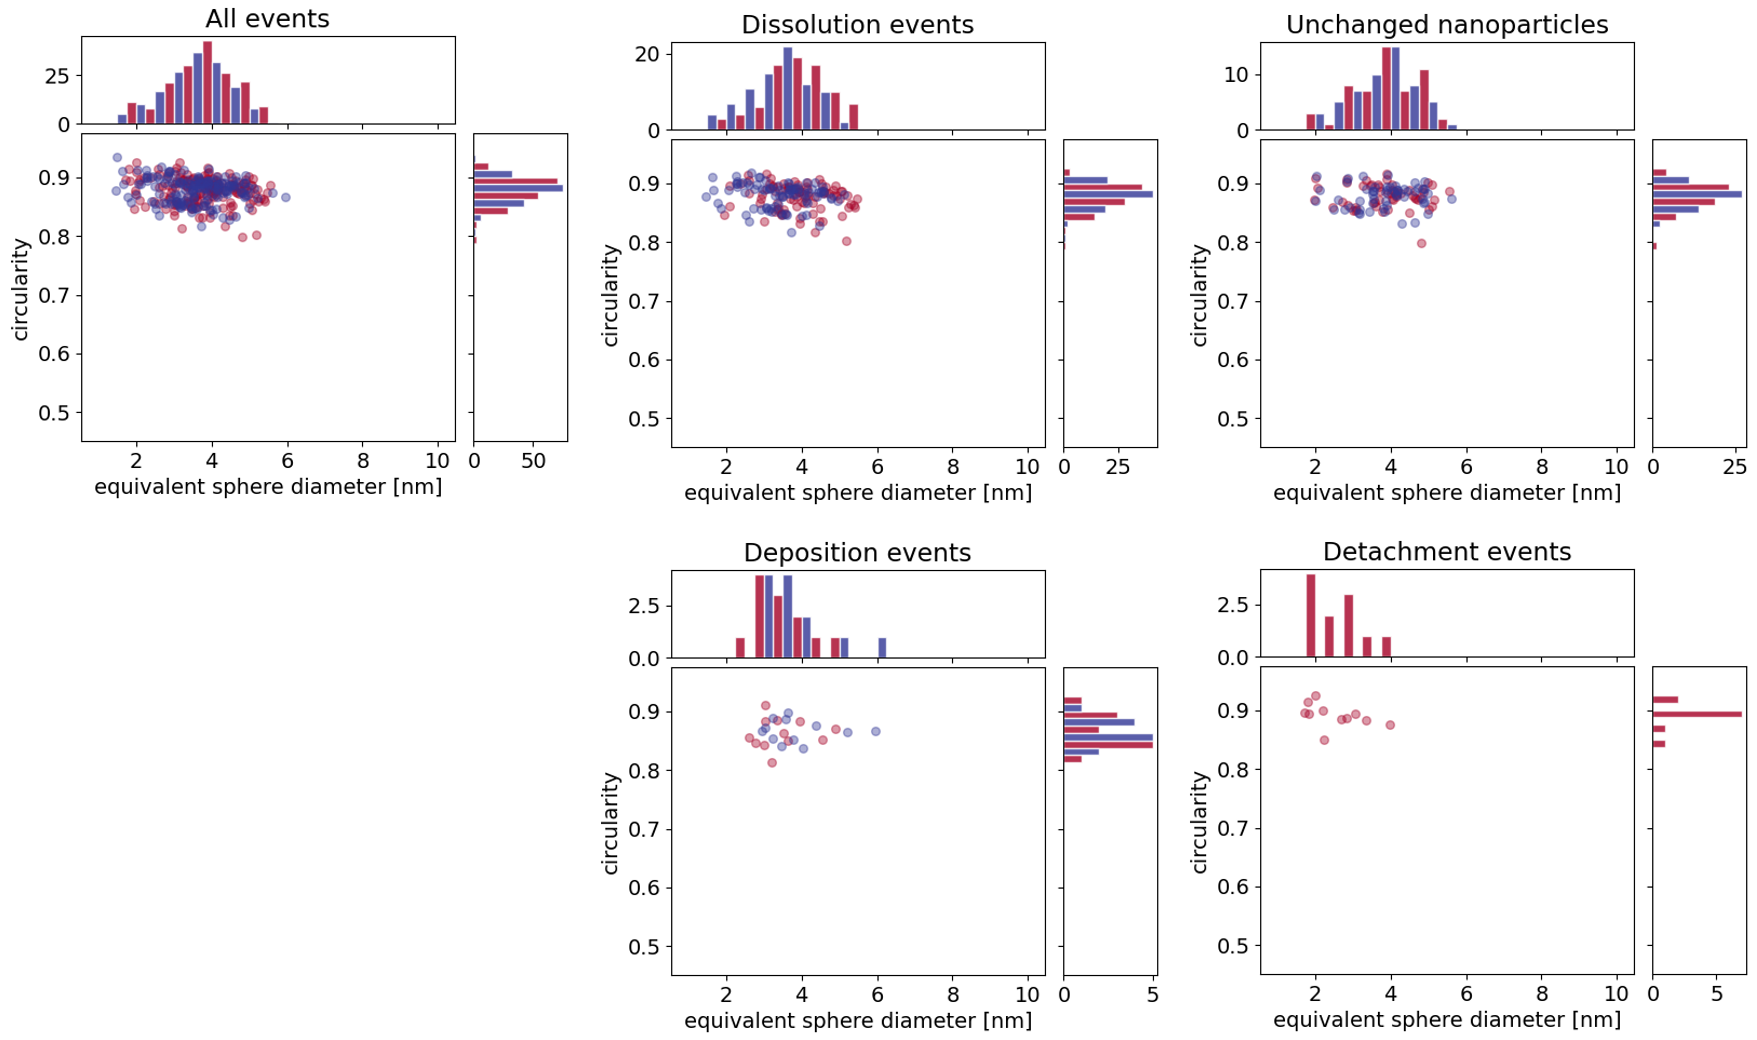


**Supplementary Fig. 7.** **Degradation events for Pt-Co nanoparticles during activation (automated detection, manual association).** Scatter plots with histograms showing circularities and equivalent sphere diameters before (red) and after (blue) activation for all events and individual degradation mechanisms (200 cycles, 0.05–1.2 VRHE, 300 mV/s, 4 M HClO4).

**Supplementary Table 5**. Average values and standard deviations of equivalent sphere diameters and circularities of Pt-Co nanoparticles (automated detection, manual association) determined for each mechanism during potential cycling activation (200 cycles, 0.05–1.2 VRHE, 300 mV/s, 0.1 M HClO4), followed by degradation (5000 cycles, 0.4–1.2 VRHE, 1 V/s, 0.1 M HClO4).

|  | **diameter, before [nm]** | **circularity, before []** | **diameter, after [nm]** | **circularity, after []** | **number of events** |
| --- | --- | --- | --- | --- | --- |
| **no changes** | 3.64 ± 0.81 | 0.89 ± 0.01 | 3.62 ± 0.80 | 0.90 ± 0.01 | 175 |
| **dissolution** | 3.49 ± 0.75 | 0.89 ± 0.01 | 2.94 ± 0.83 | 0.90 ± 0.01 | 171 |
| **detachment** | 2.47 ± 0.50 | 0.91 ± 0.01 |  |  | 83 |
| **deposition** | 3.24 ± 0.61 | 0.90 ± 0.01 | 3.65 ± 0.64 | 0.89 ± 0.01 | 67 |
| **agglomeration** | 3.92 ± 0.97 | 0.88 ± 0.01 | 4.58 ± 0.72 | 0.86 ± 0.02 | 8 |
| **attachment** |  |  | 2.67 ± 0.35 | 0.91 ± 0.00 | 3 |
| **Ostwald ripening** | 3.99 ± 0.82 | 0.89 ± 0.01 | 4.40 ± 0.81 | 0.89 ± 0.02 | 3 |


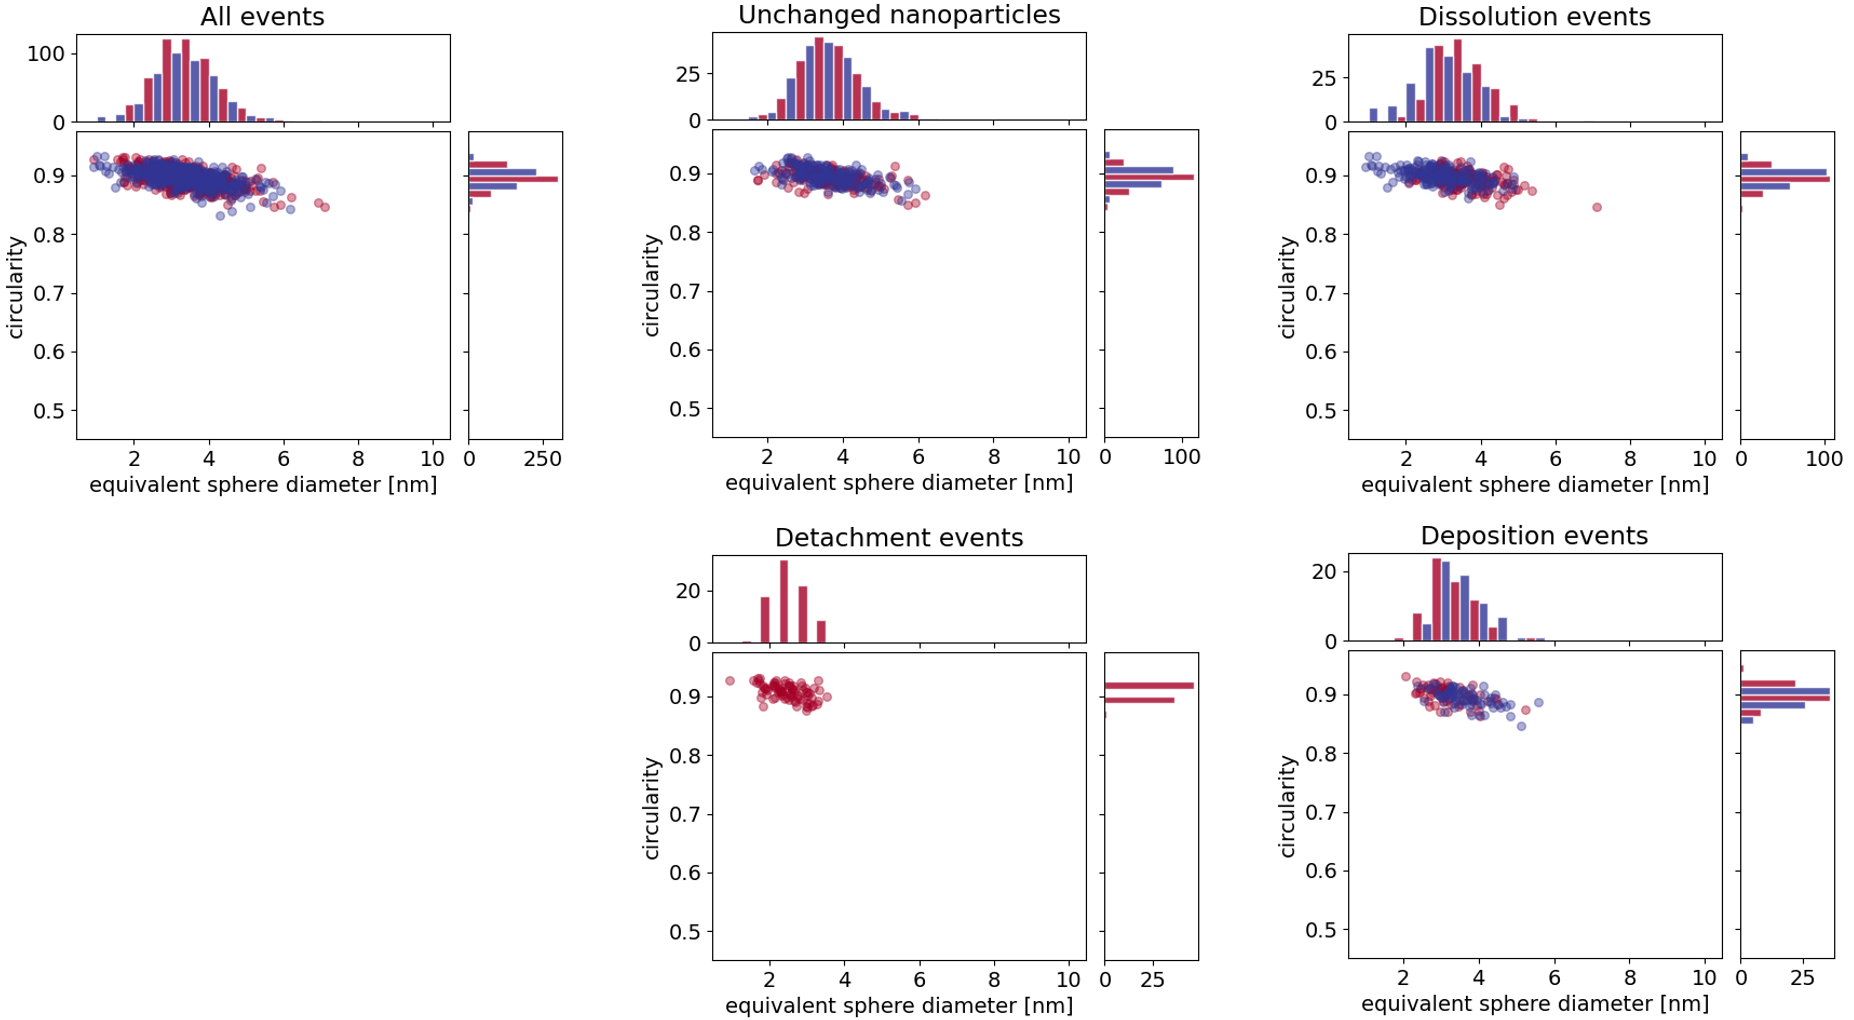


**Supplementary Fig. 8.** **Degradation events for Pt-Co nanoparticles during potential cycling activation, followed by degradation (automated detection, manual association).** Scatter plots with histograms showing circularities and equivalent sphere diameters before (red) and after (blue) activation (200 cycles, 0.05–1.2 VRHE, 300 mV/s, 0.1 M HClO4) and degradation (5000 cycles, 0.4–1.2 VRHE, 1 V/s, 0.1 M HClO4) for all events and individual degradation mechanisms.

**Supplementary Table 6**. Average values and standard deviations of equivalent sphere diameters and circularities of Pt-Co nanoparticles (manual segmentation, automated association) were determined for each mechanism during potential cycling activation (200 cycles, 0.05–1.2 VRHE, 300 mV/s, 4 M HClO4).

|  | **diameter, before [nm]** | **circularity, before []** | **diameter, after [nm]** | **circularity, after []** | **number of events** |
| --- | --- | --- | --- | --- | --- |
| **dissolution** | 3.98 ± 0.84 | 0.87 ± 0.03 | 3.38 ± 0.89 | 0.87 ± 0.02 | 96 |
| **no changes** | 3.81 ± 0.82 | 0.87 ± 0.02 | 3.77 ± 0.81 | 0.87 ± 0.02 | 46 |
| **detachment** | 2.90 ± 0.87 | 0.88 ± 0.02 |  |  | 19 |
| **deposition** | 3.20 ± 0.81 | 0.86 ± 0.02 | 3.85 ± 1.29 | 0.85 ± 0.08 | 9 |
| **agglomeration** | 3.86 ± 0.81 | 0.88 ± 0.02 | 4.52 ± 1.97 | 0.80 ± 0.12 | 8 |
| **attachment** |  |  | 2.95 ± 0.94 | 0.89 ± 0.02 | 8 |
| **complete Ostwald ripening** | 3.83 ± 0.95 | 0.86 ± 0.02 | 3.95 ± 0.72 | 0.89 ± 0.01 | 2 |
| **Ostwald ripening** | 4.74 ± 0.78 | 0.88 ± 0.02 | 5.35 ± 0.67 | 0.84 ± 0.01 | 2 |


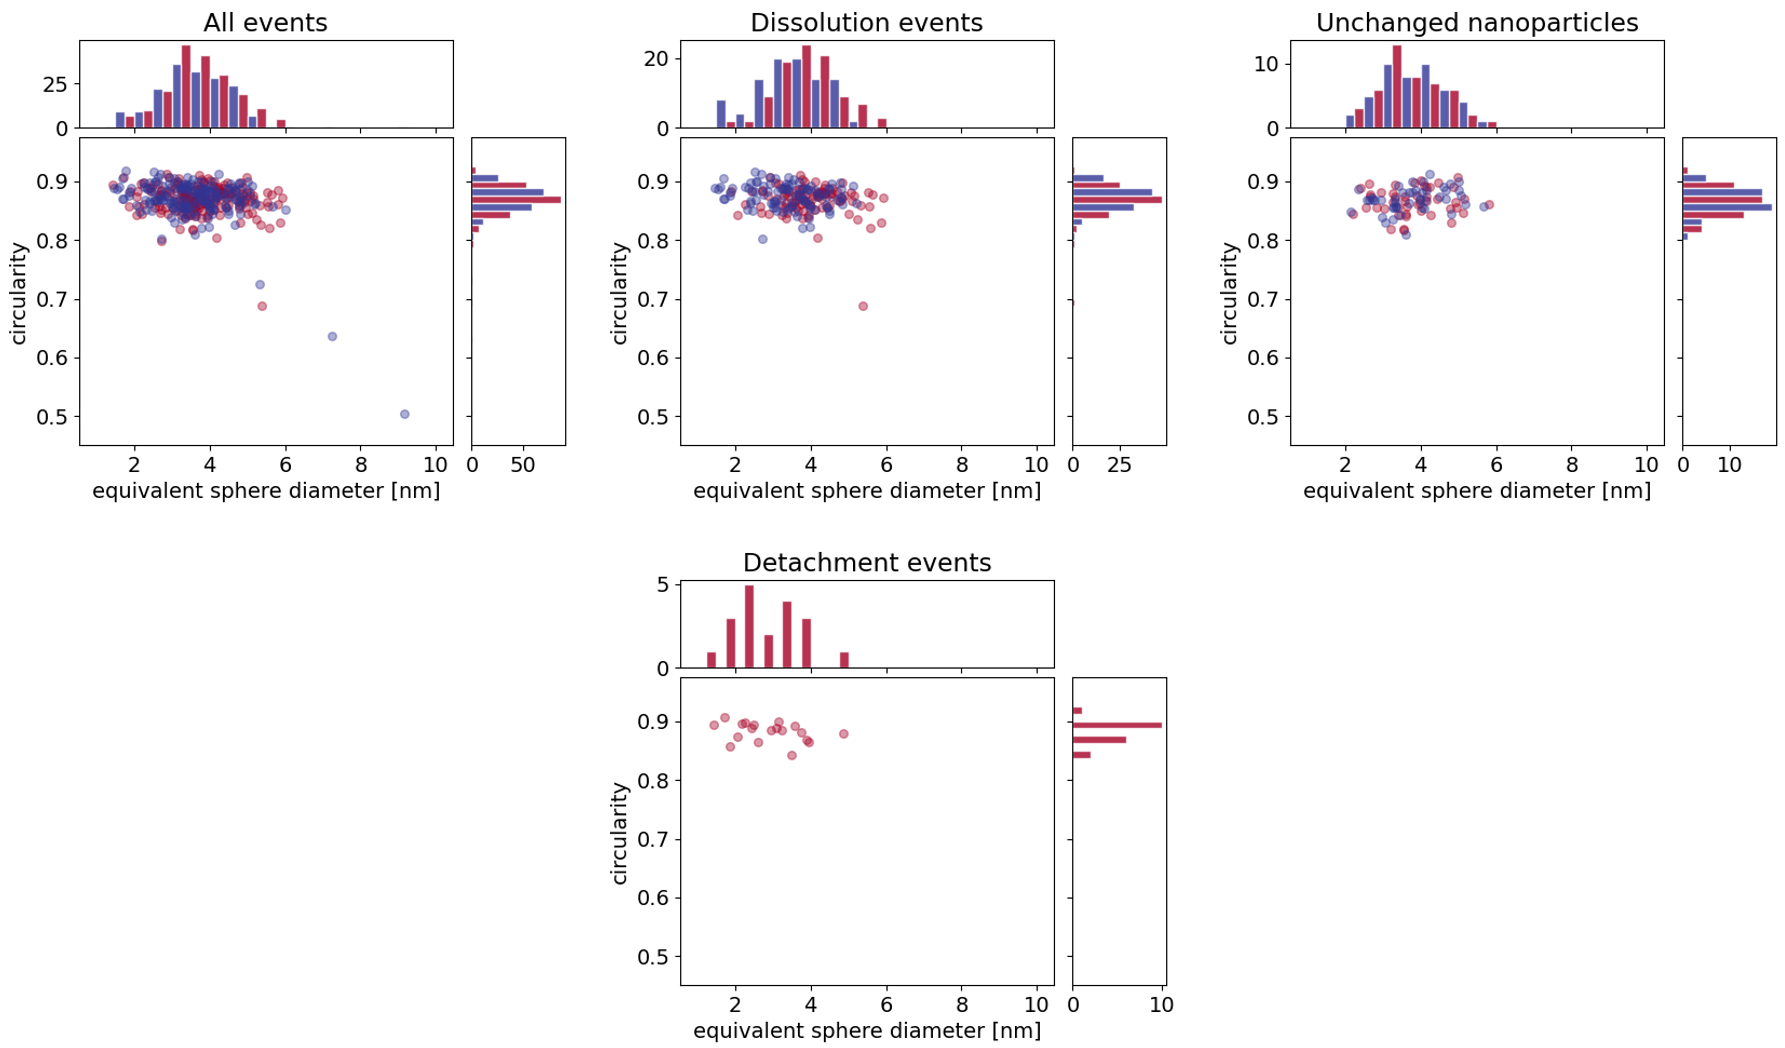


**Supplementary Fig. 9. Degradation events for Pt-Co nanoparticles during activation (manual segmentation, automated association).** Scatter plots with histograms showing circularities and equivalent sphere diameters before (red) and after (blue) activation for all events and individual degradation mechanisms (200 cycles, 0.05–1.2 VRHE, 300 mV/s, 4 M HClO4).

**Supplementary Table 7**. Average values and standard deviations of equivalent sphere diameters and circularities of Pt-Co nanoparticles (manual segmentation, automated association) determined for each mechanism during potential cycling activation (200 cycles, 0.05–1.2 VRHE, 300 mV/s, 0.1 M HClO4), followed by degradation (5000 cycles, 0.4–1.2 VRHE, 1 V/s, 0.1 M HClO4).

|  | **diameter, before [nm]** | **circularity, before []** | **diameter, after [nm]** | **circularity, after []** | **number of events** |
| --- | --- | --- | --- | --- | --- |
| **dissolution** | 3.70 ± 0.79 | 0.88 ± 0.02 | 3.03 ± 1.00 | 0.87 ± 0.02 | 201 |
| **no changes** | 3.75 ± 0.87 | 0.88 ± 0.01 | 3.76 ± 0.87 | 0.87 ± 0.02 | 190 |
| **detachment** | 2.73 ± 0.67 | 0.88 ± 0.03 |  |  | 112 |
| **deposition** | 3.48 ± 0.93 | 0.88 ± 0.02 | 4.12 ± 1.18 | 0.87 ± 0.04 | 62 |
| **attachment** |  |  | 2.52 ± 1.06 | 0.87 ± 0.03 | 24 |
| **agglomeration** | 3.88 ± 0.94 | 0.88 ± 0.01 | 3.86 ± 0.92 | 0.86 ± 0.04 | 23 |
| **Ostwald ripening** | 4.32 ± 1.18 | 0.89 ± 0.01 | 4.82 ± 1.41 | 0.85 ± 0.05 | 7 |
| **complete Ostwald ripening** | 3.86 ± 0.81 | 0.81 ± 0.02 | 3.68 ± 0.73 | 0.88 ± 0.01 | 5 |


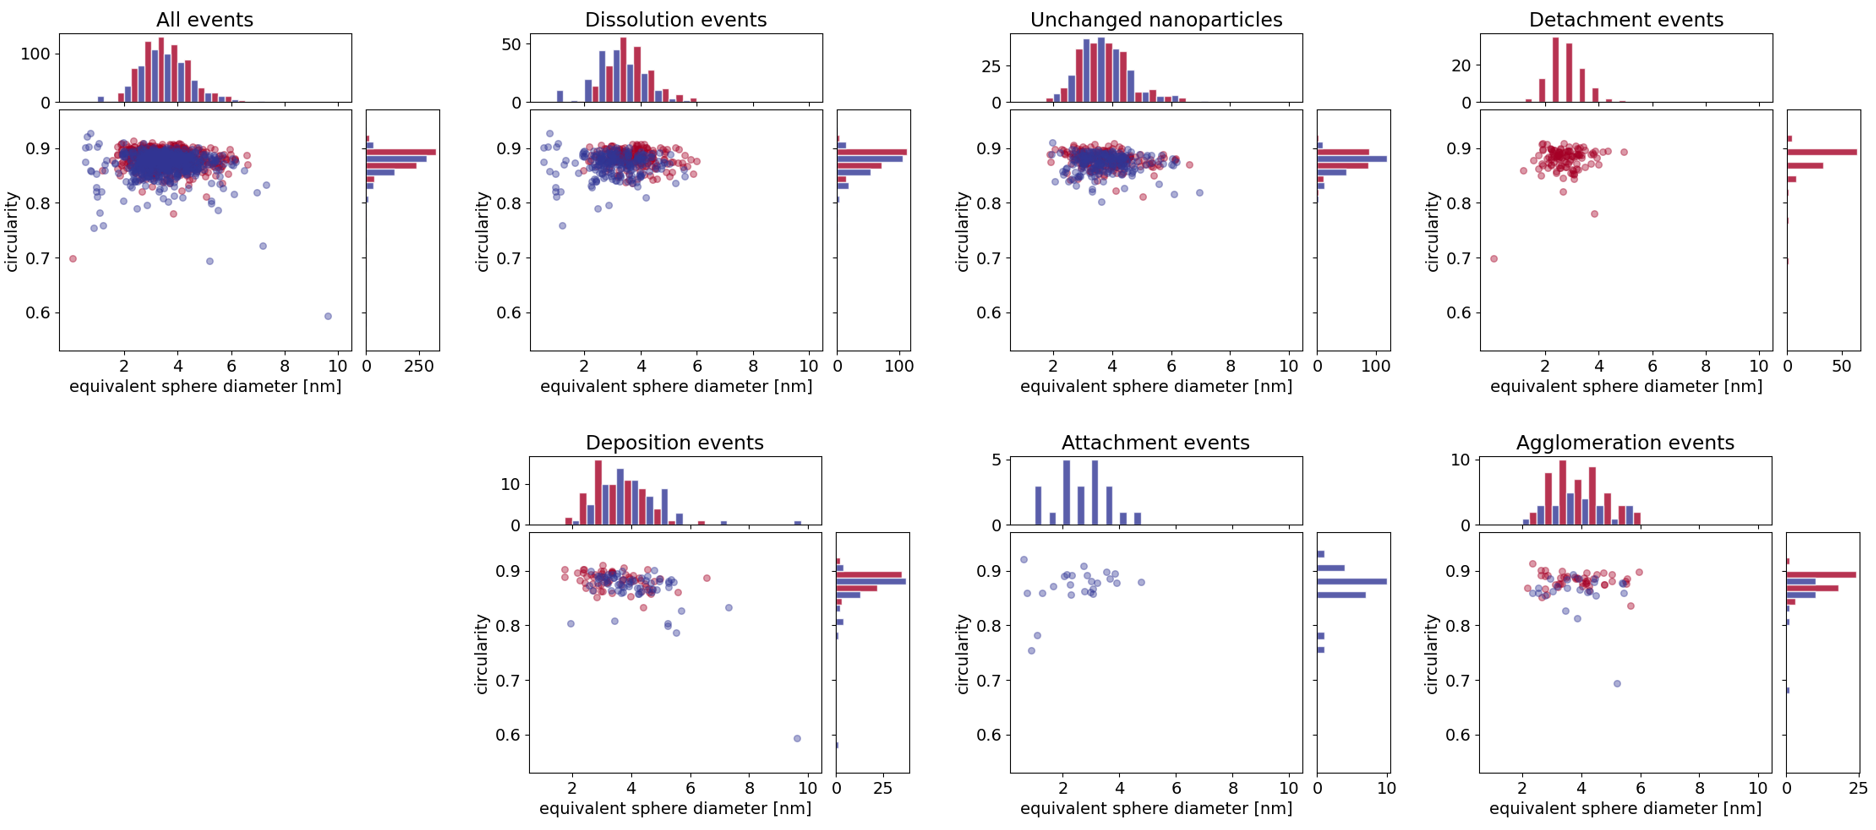


**Supplementary Fig. 10. Degradation events for Pt-Co nanoparticles during potential cycling activation, followed by degradation (manual segmentation, automated association).** Scatter plots with histograms showing circularities and equivalent sphere diameters before (red) and after (blue) activation (200 cycles, 0.05–1.2 VRHE, 300 mV/s, 0.1 M HClO4) and degradation (5000 cycles, 0.4–1.2 VRHE, 1 V/s, 0.1 M HClO4) for all events and individual degradation mechanisms.

**Supplementary Table 8**. Average values and standard deviations of equivalent sphere diameters and circularities of Pt-Co nanoparticles (automated detection, automated association) were determined for each mechanism during potential cycling activation (200 cycles, 0.05–1.2 VRHE, 300 mV/s, 4 M HClO4).

|  | **diameter, before [nm]** | **circularity, before []** | **diameter, after [nm]** | **circularity, after []** | **number of events** |
| --- | --- | --- | --- | --- | --- |
| **dissolution** | 3.95 ± 0.84 | 0.87 ± 0.02 | 3.37 ± 0.85 | 0.88 ± 0.02 | 88 |
| **no changes** | 3.81 ± 0.82 | 0.88 ± 0.02 | 3.77 ± 0.81 | 0.88 ± 0.02 | 51 |
| **detachment** | 2.77 ± 0.72 | 0.89 ± 0.02 |  |  | 19 |
| **attachment** |  |  | 3.02 ± 0.94 | 0.88 ± 0.02 | 15 |
| **deposition** | 2.95 ± 0.63 | 0.87 ± 0.02 | 3.50 ± 0.80 | 0.87 ± 0.01 | 10 |
| **Ostwald ripening** | 3.66 ± 0.55 | 0.86 ± 0.03 | 4.08 ± 0.77 | 0.86 ± 0.02 | 8 |
| **agglomeration** | 3.93 ± 0.18 | 0.88 ± 0.01 | 4.30 ± 0.11 | 0.88 ± 0.01 | 2 |
| **complete Ostwald ripening** | 4.54 ± 0.52 | 0.86 ± 0.01 | 2.77 ± 0.00 | 0.89 ± 0.00 | 1 |


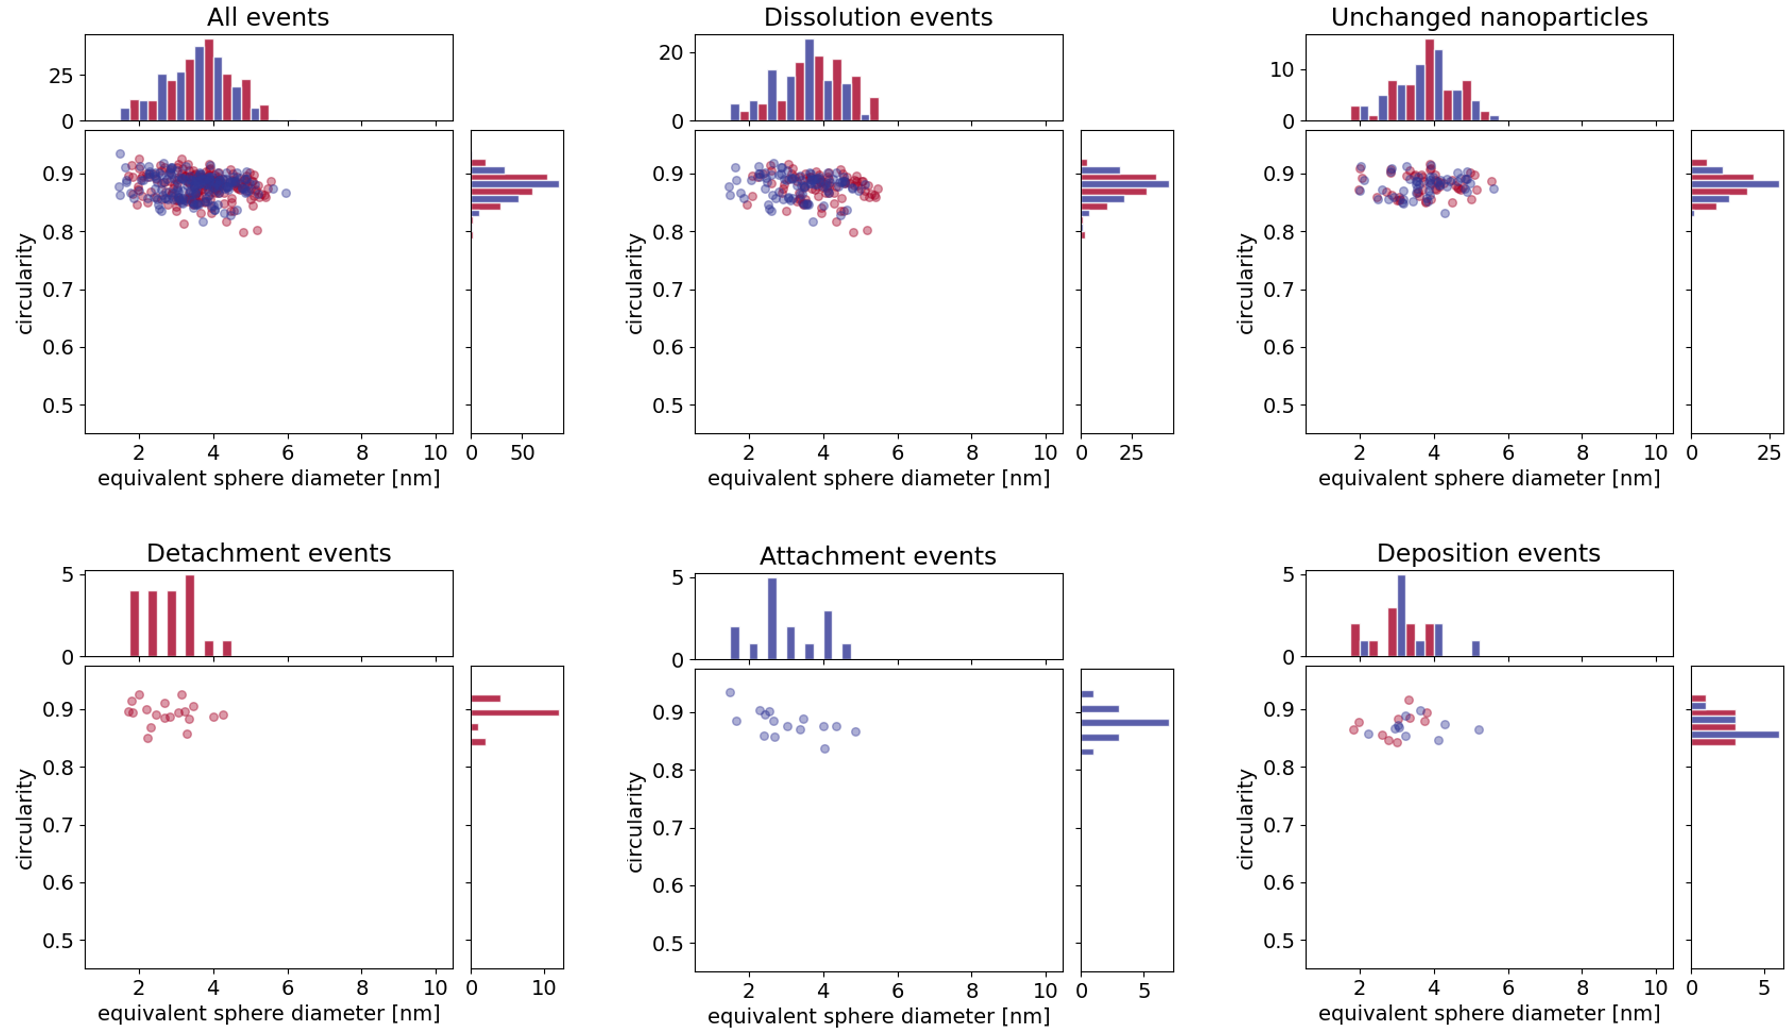


**Supplementary Fig. 11.** **Degradation events for Pt-Co nanoparticles during activation (automated detection, automated association).** Scatter plots with histograms showing circularities and equivalent sphere diameters before (red) and after (blue) activation for all events and individual degradation mechanisms (200 cycles, 0.05–1.2 VRHE, 300 mV/s, 4 M HClO4).

**Supplementary Table 9**. Average values and standard deviations of equivalent sphere diameters and circularities of Pt-Co nanoparticles (automated detection, automated association) determined for each mechanism during potential cycling activation (200 cycles, 0.05–1.2 VRHE, 300 mV/s, 0.1 M HClO4), followed by degradation (5000 cycles, 0.4–1.2 VRHE, 1 V/s, 0.1 M HClO4).

|  | **diameter, before [nm]** | **circularity, before []** | **diameter, after [nm]** | **circularity, after []** | **number of events** |
| --- | --- | --- | --- | --- | --- |
| **no changes** | 3.59 ± 0.78 | 0.89 ± 0.02 | 3.58 ± 0.79 | 0.90 ± 0.01 | 160 |
| **dissolution** | 3.47 ± 0.74 | 0.89 ± 0.01 | 2.92 ± 0.84 | 0.90 ± 0.01 | 150 |
| **detachment** | 2.59 ± 0.74 | 0.91 ± 0.01 |  |  | 92 |
| **deposition** | 3.20 ± 0.62 | 0.90 ± 0.01 | 3.64 ± 0.63 | 0.89 ± 0.02 | 64 |
| **attachment** |  |  | 2.90 ± 1.02 | 0.90 ± 0.02 | 28 |
| **agglomeration** | 3.62 ± 0.96 | 0.90 ± 0.02 | 3.99 ± 0.68 | 0.88 ± 0.01 | 15 |
| **complete Ostwald ripening** | 4.50 ± 0.95 | 0.87 ± 0.01 | 4.34 ± 1.00 | 0.89 ± 0.01 | 4 |
| **Ostwald ripening** | 3.25 ± 0.42 | 0.91 ± 0.01 | 3.45 ± 0.46 | 0.90 ± 0.01 | 3 |

**
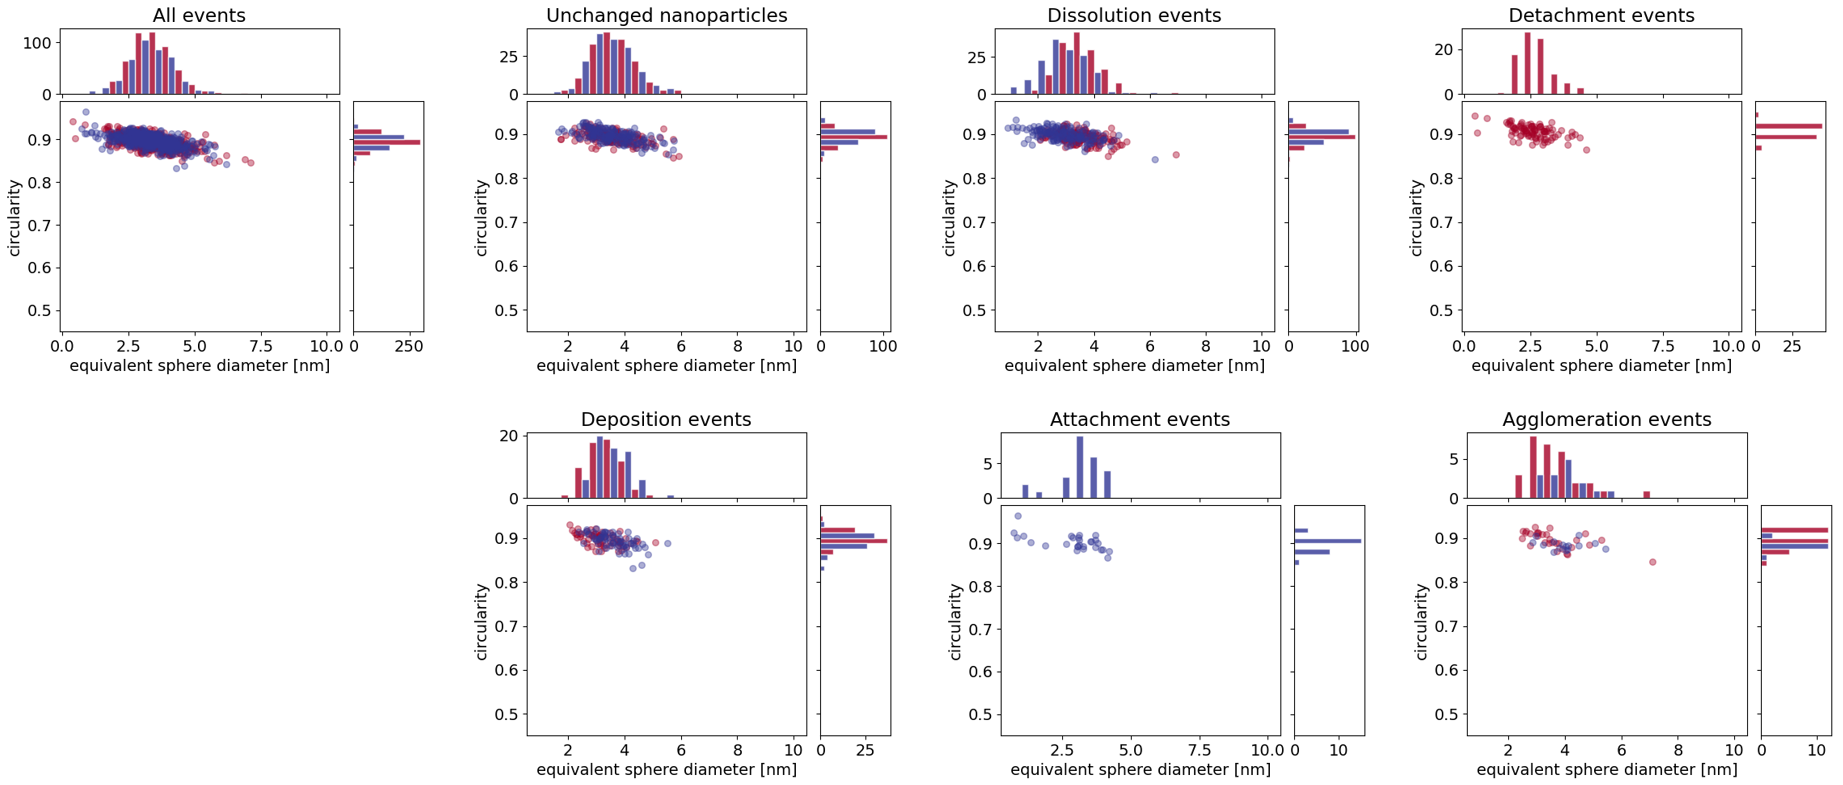
**

**Supplementary Fig. 12.** **Degradation events for Pt-Co nanoparticles during potential cycling activation, followed by degradation (automated detection, automated association).** Scatter plots with histograms showing circularities and equivalent sphere diameters before (red) and after (blue) activation (200 cycles, 0.05–1.2 VRHE, 300 mV/s, 0.1 M HClO4) and degradation (5000 cycles, 0.4–1.2 VRHE, 1 V/s, 0.1 M HClO4) for all events and individual degradation mechanisms.

**SI 6. Modeling metal dissolution and carbon corrosion on model nanoparticles**

**Supplementary Note 2: Details on theoretical modeling of particle evolution during activation**

The mathematical model of metal dissolution and carbon corrosion describes morphological development of the catalyst as a consequence of electrochemical reactions taking place on the surface of catalyst particles and the adjacent carbon surface. The model aims to describe the changes in sizes () and positions () of a limited set of particles, observed with STEM.

1. Particle size

The change of particle sizes was modelled by describing the electrochemical processes of catalyst dissolution and redeposition. To simplify the modelling, it was assumed that the catalyst particle surface is always formed of Pt, a reasonable first approximation given that the small analyzed nanoparticles contain approximately 65 at.% of Pt.1 This allows for the use of well-established electrochemical processes on the Pt surface. Pt dissolution and redeposition lead to a direct change in particle size.

PtDD: (1)

Crucially, the equilibrium electric potential of a catalyst particle is affected by its size via the Kelvin term:, where r is the particle radius, surface tension, molar mass, density, and Faraday constant.

The Kelvin term lowers the equilibrium potential of smaller particles more than larger particles, leading to faster dissolution and potential transfer of Pt from smaller towards larger particles.5 Dissolution and redeposition of Pt were modelled as a Butler-Volmer reaction, describing the time derivative of particles:6

, (2)

where and are reaction rate constants of dissolution and deposition, is the charge transfer coefficient, and is the gas constant. The dynamics is primarily driven by the changes in electric potential , but is also significantly affected by temperature and the concentrations of Pt2+ ions in the vicinity of the i-th particle .

To describe the dynamics of these concentrations, we assigned each particle a control volume , defined by a Voronoi diagram, attributed to the particle positions .7 The change of Pt2+ ions concentration due to dissolution and redeposition is thus calculated as

. (3)

The transfer of Pt2+ ions between neighboring Voronoi volumes is controlled by diffusion

(4)

where is Pt2+ ion diffusivity, the contact surface between i-th and j-th Voronoi volumes, and the distance between i-th and j-th particle, with summation taken over neighbouring Voronoi volumes. The loss of Pt due to diffusion into the electrolyte is described similarly:

(5)

with and describing the contact surface and distance to the exterior of the Voronoi diagram.

1. Detachment and agglomeration

Detachment and agglomeration of catalyst particles are described in the model as a result of corrosion of carbon support around the particles, which is in turn caused by oxidation processes on Pt and the carbon surface.8 The corrosion is initiated by the formation of hydroxide and oxide groups at different equilibrium potentials:

C1: RHE

C2: RHE (6)

Pt1: RHE

Pt2: RHE

The dynamics of these processes on the i-th particle are described by Butler-Volmer equations.6

,

, (7)

,

.

Reaction rates are determined by reaction rate constants , equilibrium potentials , and charge transfer coefficients for each of the reactions (j = C1, C2, Pt1, Pt2), as well as by relative surface coverages of i-th particle with PtOH groups (, PtO groups (, and unoxidised surface Pt* (, and relative coverage of its surrounding carbon support with COH groups (, CO groups (, and unoxidised surface C* (. and denote water and proton activity and describes the interaction between Pt surface oxides, with . As for the case of Pt dissolution, the equilibrium potential of Pt oxidation is affected by particle size via the Kelvin term

, (8)

.

with and referring to surface tension, molar mass, and density of the species.

Surface coverages of oxide groups , , and determine the rates of carbon corrosion via two electrochemical reactions. Carbon hydroxide groups COH can react either with water or with Pt hydroxide PtOH, via reactions

C3: RHE

PtC: RHE (9)

with reaction rates

, (10)

.

The dynamics of oxide surface growth is determined by reaction rates , , , , and surface density of defect sites and on Pt and carbon surface, respectively.6,9

*,*

*,* (11)

*,*

.

Furthermore, carbon corrosion rates and determine how the contact surface between the catalyst particle and carbon support changes over time. In the model, the contact surface of the i-th particle was described by the contact angle resulting in the contact surface

. (12)

Assuming that carbon corrosion takes place up to the distance from the particle, the rate of change of contact angle can be written as

(13)

where and are the density and molar mass of carbon.

Carbon corrosion can lead to the detachment and agglomeration of particles even before the contact angle reduces to zero, provided that the attractive forces between particles are sufficiently strong. The agglomeration process was modelled by comparing the attraction forces between particles with the adhesion force between particles and the carbon support.

It was assumed in the model that the i-th and j-th particles are attracted by the Casimir force10

(14)

which depends on the particle radii and , and the distance between particle surfaces .

The total attraction force on the i-th particle is therefore

(15)

The adhesion force on the particle is exactly opposite the attraction force, as long as attraction is not too strong. The limiting force that can be produced by adhesion is assumed to be directly proportional to the contact surface, The total force on the i-th particle is therefore

(16)

The movement of particles due to force was modelled under the assumption of strong drag, resulting in velocity being proportional to the force, changing the particle position as

. (17)

In total, 10 variables are modelled for each particle: particle size , 3 coordinates of position , Pt2+ ion concentration , oxide coverages , , , and contact angle .

Calibration of the model, aimed at achieving the best fit between experimental data and model results, was performed by adjusting the values of the following model parameters: reaction rate constants , *,* Pt2+ ion diffusivity , Pt2+ ion concentration in the electrolyte , and relative strenghts of Casimir () and adhesion force ().

The values of other parameters were adopted from the literature. The values of all model parameters are listed in **Supplementary Table 10**.

**Supplementary Table 10**. List of parameters used in the model. The values of parameters are accompanied by a short description and the source.

| Parameter | Value | Units | Description | Source |
| --- | --- | --- | --- | --- |
|  | 0.2 |  | Equilibrium potential for reaction | Ref. 11 |
|  | 0.7 |  | Equilibrium potential for reaction | Ref. 11 |
|  | 0.8 |  | Equilibrium potential for reaction | Ref. 11 |
|  | 0.8 |  | Equilibrium potential for reaction | Ref. 11 |
|  | 0.95 |  | Equilibrium potential for reaction | Ref. 11 |
|  | 0.65 |  | Equilibrium potential for reaction | Ref. 11 |
|  | 1.188 |  | Equilibrium potential for Pt dissolution | Ref. 12 |
|  | 0.5 |  | Charge transfer coefficient for reaction | assumed |
|  | 0.5 |  | Charge transfer coefficient for reaction | assumed |
|  | 0.5 |  | Charge transfer coefficient for reaction | assumed |
|  | 0.5 |  | Charge transfer coefficient for reaction | assumed |
|  | 0.5 |  | Charge transfer coefficient for reaction | assumed |
|  | 0.5 |  | Charge transfer coefficient for reaction | assumed |
|  | 0.5 |  | Charge transfer coefficient for Pt dissolution | assumed |
|  |  |  | Reaction rate constant for reaction | fitted |
|  |  |  | Reaction rate constant for reaction | fitted |
|  |  |  | Reaction rate constant for reaction | fitted |
|  |  |  | Reaction rate constant for reaction | fitted |
|  |  |  | Reaction rate constant for reaction | fitted |
|  |  |  | Reaction rate constant for reaction | fitted |
|  |  |  | Reaction rate constant for Pt dissolution | fitted |
|  |  |  | Reaction rate constant for Pt deposition | fitted |
|  | 2.15 |  | Pt oxidation surface area | Ref. 8 |
|  | 4.6 |  | Carbon oxidation surface area | Ref. 8 |
|  |  |  | Carbon corrosion depth | Ref. 8 |
|  |  |  | Diffusivity of | fitted |
|  |  |  | Reference concentration | Ref. 12 |
|  |  |  | concentration in electrolyte | fitted |
|  | 30 |  | Pt oxide interaction | Ref. 12 |
|  | 0.3 |  | Pt oxidation reversibility | Ref. 13 |
|  |  |  | Casimir force strength | assumed |
|  |  |  | Adhesion force strength | fitted |
|  |  |  | Drag coefficient | assumed |
|  | 21090 |  | Pt density | Ref. 12 |
|  | 14170 |  | Pt-OH density | Ref. 8 |
|  | 14100 |  | Pt=O density | Ref. 12 |
|  | 2000 |  | Carbon density | - |
|  | 2.73 |  | Pt surface tension | Ref. 12 |
|  | 1.34 |  | Pt-OH surface tension | Ref. 8 |
|  | 1 |  | Pt=O surface tension | Ref. 12 |
|  | 195 |  | Pt molar mass | Ref. 12 |
|  | 212 |  | Pt-OH molar mass | Ref. 8 |
|  | 211 |  | Pt=O molar mass | Ref. 12 |
|  | 12 |  | Carbon molar mass | - |
|  | 18 |  | Water molar mass | - |

The geometric parameters of the 11 model nanoparticles before and after simulated potential cycling conditions are listed in **Supplementary Table 11**.

**Supplementary Table 11**. Radii, contact angles, and contact surfaces for all analyzed model nanoparticles.

| particle id | radius, before [nm] | angle, before [rad] | surface, before [nm2] | radius, after  [nm] | angle, after  [rad] | surface, after [nm2] | surface change [nm2] |
| --- | --- | --- | --- | --- | --- | --- | --- |
| 1 | 1.99 | 1.57 | 24.83 | 1.86 | 0.08 | 0.08 | 24.75 |
| 2 | 1.40 | 1.57 | 12.29 | 0.99 | 0.01 | 0.00 | 12.29 |
| 3 | 1.61 | 1.57 | 16.21 | 1.38 | 0.01 | 0.00 | 16.21 |
| 4 | 1.99 | 1.57 | 24.90 | 1.86 | 0.08 | 0.08 | 24.82 |
| 5 | 1.85 | 1.57 | 21.49 | 1.70 | 0.03 | 0.01 | 21.48 |
| 6 | 1.85 | 1.57 | 21.55 | 1.70 | 0.03 | 0.01 | 21.55 |
| 7 | 2.77 | 1.57 | 48.11 | 2.70 | 0.39 | 3.38 | 44.72 |
| 8 | 2.19 | 1.57 | 30.25 | 2.09 | 0.18 | 0.43 | 29.81 |
| 9 | 1.82 | 1.57 | 20.87 | 1.67 | 0.03 | 0.01 | 20.86 |
| 10 | 1.21 | 1.57 | 9.25 | 0.00 | 0.13 | 0.00 | 9.25 |
| 11 | 1.77 | 1.57 | 19.73 | 1.61 | 0.02 | 0.00 | 19.73 |

**
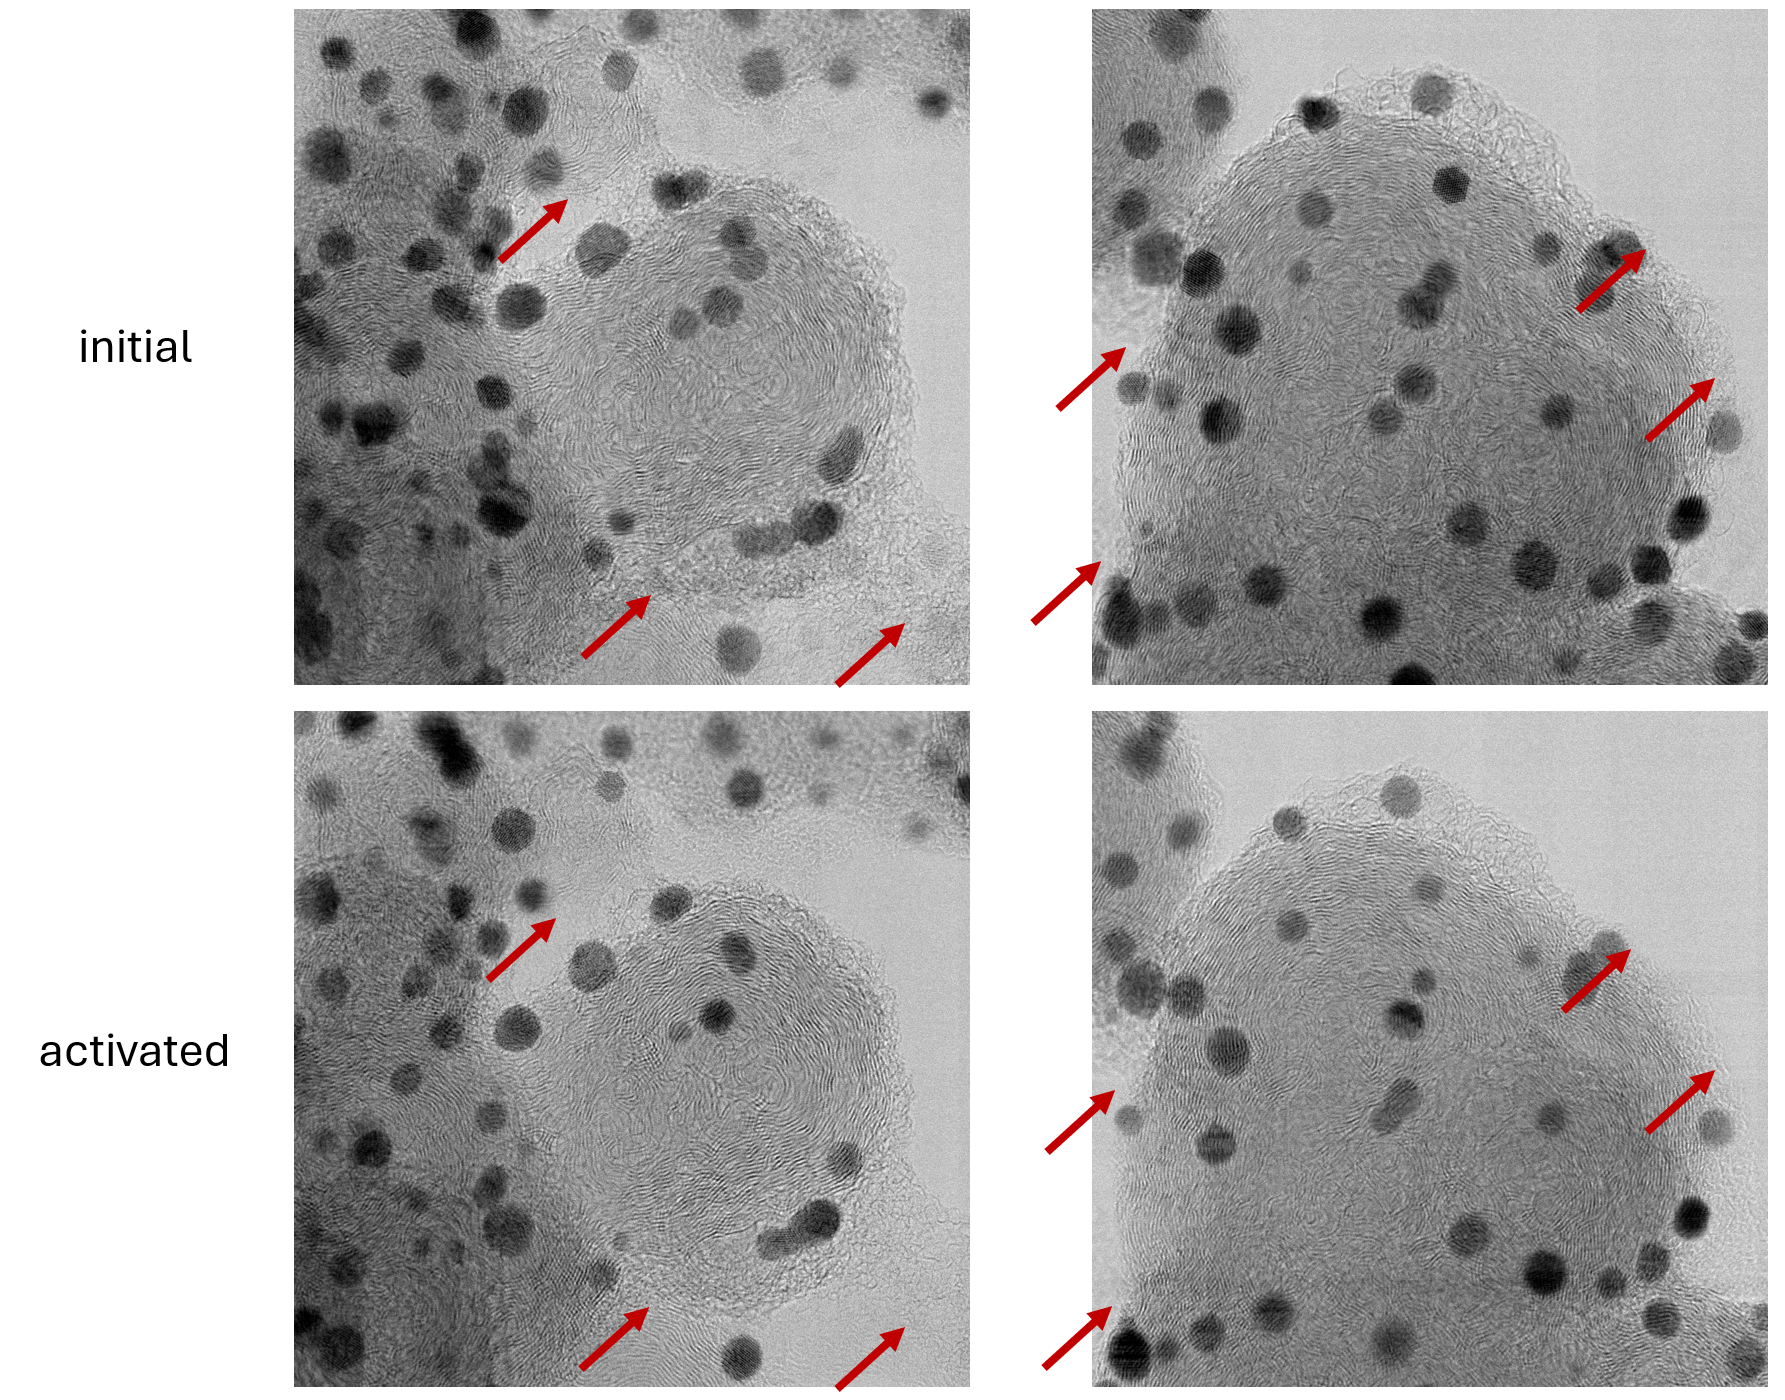
**

**Supplementary Fig. 13. Instances of carbon corrosion in IL-BF-STEM images.** Images of the Pt-Co/C electrocatalyst before (top) and after (bottom) activation (200 cycles, 0.05–1.2 VRHE, 300 mV/s, 4 M HClO4) with red arrows pointing to carbon support changes.

**References**

(1) Moriau, L. J.; Hrnjić, A.; Pavlišič, A.; Kamšek, A. R.; Petek, U.; Ruiz-Zepeda, F.; Šala, M.; Pavko, L.; Šelih, V. S.; Bele, M.; Jovanovič, P.; Gatalo, M.; Hodnik, N. Resolving the Nanoparticles’ Structure-Property Relationships at the Atomic Level: A Study of Pt-Based Electrocatalysts. *iScience* **2021**, *24* (2), 102102. https://doi.org/10.1016/j.isci.2021.102102.

(2) Tabernik, D.; Muhovič, J.; Skočaj, D. Dense Center-Direction Regression for Object Counting and Localization with Point Supervision. *Pattern Recognit* **2024**, *153*. https://doi.org/10.1016/j.patcog.2024.110540.

(3) Tabernik, D.; Muhovič, J.; Urbas, M.; Skočaj, D. Center Direction Network for Grasping Point Localization on Cloths. *IEEE Robot Autom Lett* **2024**, *9* (10), 8913–8920. https://doi.org/10.1109/LRA.2024.3455802.

(4) Kendall, A.; Gal, Y.; Cipolla, R. Multi-Task Learning Using Uncertainty to Weigh Losses for Scene Geometry and Semantics. In *Proceedings of the IEEE Conference on Computer Vision and Pattern Recognition (CVPR)*; 2018; pp 7482–7491.

(5) Plieth, W. J. Electrochemical Properties of Small Clusters of Metal Atoms and Their Role in Surface Enhanced Raman Scattering. *J Phys Chem* **1982**, *86*, 3166–3170. https://doi.org/https://doi.org/10.1021/j100213a020.

(6) Kregar, A.; Gatalo, M.; Maselj, N.; Hodnik, N.; Katrašnik, T. Temperature Dependent Model of Carbon Supported Platinum Fuel Cell Catalyst Degradation. *J Power Sources* **2021**, *514*. https://doi.org/10.1016/j.jpowsour.2021.230542.

(7) Voronoi, G. Nouvelles Applications Des Parametres Continus La Th Orie Des Formes Quadratiques. Sur Quelques Proprietes Des Formes Quadratiques Positives Parfaites. *Journal für die reine und angewandte Mathematik* **1908**, No. 133, 97–102. https://doi.org/https://doi.org/10.1515/crll.1908.133.97.

(8) Kregar, A.; Tavčar, G.; Kravos, A.; Katrašnik, T. Predictive System-Level Modeling Framework for Transient Operation and Cathode Platinum Degradation of High Temperature Proton Exchange Membrane Fuel Cells. *Appl Energy* **2020**, *263*, 114547. https://doi.org/10.1016/j.apenergy.2020.114547.

(9) Kregar, A.; Kravos, A.; Katrašnik, T. Methodology for Evaluation of Contributions of Ostwald Ripening and Particle Agglomeration to Growth of Catalyst Particles in PEM Fuel Cells. *Fuel Cells* **2020**, *20* (4), 487–498. https://doi.org/10.1002/fuce.201900208.

(10) Teo, L. P. Casimir Effect between Two Spheres at Small Separations. *Physical Review D - Particles, Fields, Gravitation and Cosmology* **2012**, *85* (4). https://doi.org/10.1103/PhysRevD.85.045027.

(11) Pandy, A.; Yang, Z.; Gummalla, M.; Atrazhev, V. V.; Kuzminyh, N. Yu.; Sultanov, V. I.; Burlatsky, S. A Carbon Corrosion Model to Evaluate the Effect of Steady State and Transient Operation of a Polymer Electrolyte Membrane Fuel Cell. *J. Electrochem. Soc.* **2013**, *160* (9), F972–F979. https://doi.org/10.1149/2.036309jes.

(12) Bi, W.; Gray, G. E.; Fuller, T. F. PEM Fuel Cell PtC Dissolution and Deposition in Nafion Electrolyte. *Electrochemical and Solid-State Letters* **2007**, *10* (5), 101–104. https://doi.org/10.1149/1.2712796.

(13) Darling, R. M.; Meyers, J. P. Kinetic Model of Platinum Dissolution in PEMFCs. *J Electrochem Soc* **2003**, *150* (11), A1523. https://doi.org/10.1149/1.1613669.
